# Supplementary material for: Chromosome-Wide Characterization of Intragenic Crossover in Shiitake Mushroom, Lentinula edodes
Source: MDPI journal article supplement (doi:10.3390/jof7121076), 2021-12-15
Supplement: s1 [file s1]

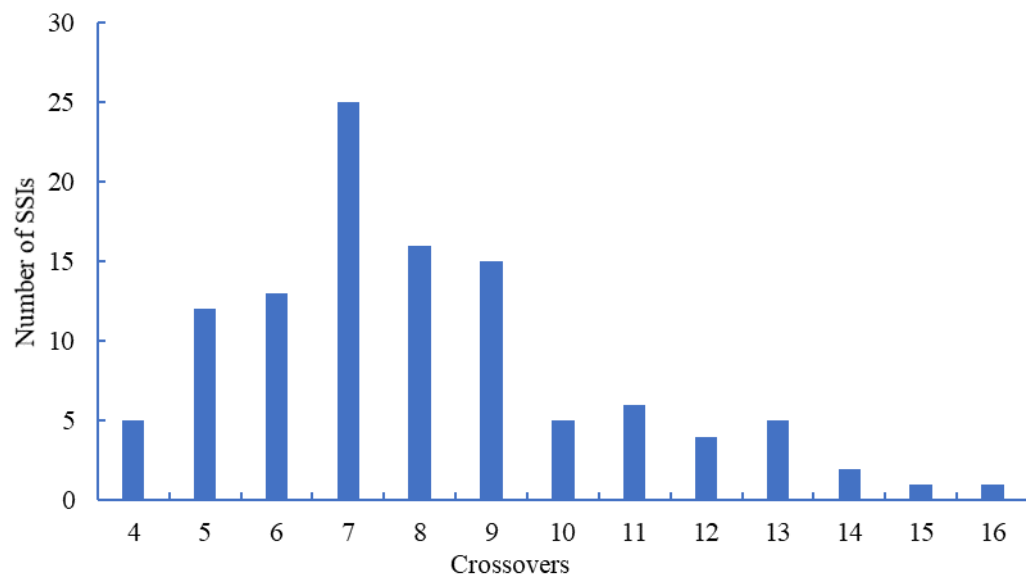

**Figure S1. Variation of crossovers among the 110 SSIs.**

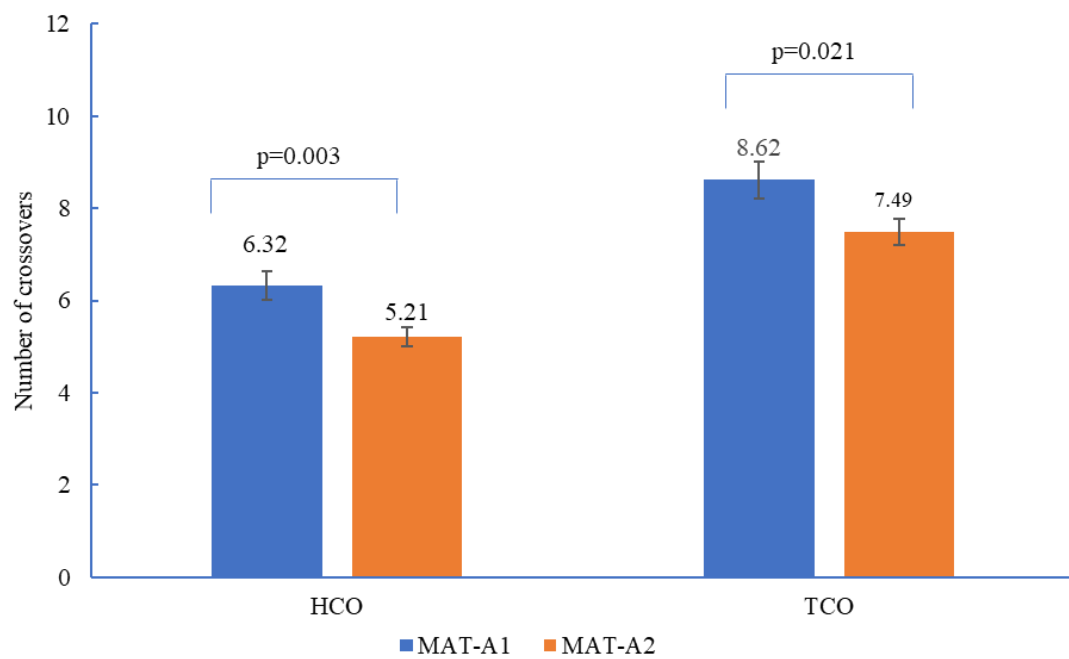

**Figure S2. Significant differences of TCO and HCO among the SSIs with different MAT-A loci.**
