# Supplementary material for: Chromosome-Wide Characterization of Intragenic Crossover in Shiitake Mushroom, Lentinula edodes
Source: J Fungi (Basel). 2021 Dec 15;7(12):1076. doi: 10.3390/jof7121076 (PMC8704546; doi:10.3390/jof7121076)
Supplement: Supplementary file 1 [file jof-07-01076-s001.zip › Supplementary File S1.findCrossover.py]

def main():
	allLines=[]
	with open('geneticMap.geneticDistanceComputed') as fi:
		hd=fi.readline().strip().split('\t')
		for line in fi:
			ll=line.strip().split('\t')
			ll[2]=ll[2].split('|')
			allLines.append(ll)
	
	fo=open('crossover.all','w')
	for j in range(3, len(hd)):
		for i in range(1, len(allLines)):
			if allLines[i][j]!=allLines[i-1][j]:
				if allLines[i][0]==allLines[i-1][0]:
					fo.write('{}\t{}\t{}\t{}\t{}->{}\n'.format(hd[j], allLines[i][0], allLines[i-1][2][1], allLines[i][2][1], allLines[i-1][j], allLines[i][j]))
	fo.close()

main()
