# Supplementary material for: Chromosome-Wide Characterization of Intragenic Crossover in Shiitake Mushroom, Lentinula edodes
Source: J Fungi (Basel). 2021 Dec 15;7(12):1076. doi: 10.3390/jof7121076 (PMC8704546; doi:10.3390/jof7121076)
Supplement: Supplementary file 1 [file jof-07-01076-s001.zip › Supplementary Tables.xlsx]

## Sheet: Table S1
Table S1. Crossovers in the 110 single spore isolates.
Individual ID	chr1	chr2	chr3	chr4	chr5	chr6	chr7	chr8	chr9	Sum
3	1	0	1	1	1	1	0	0	0	5
4	3	2	3	0	2	0	0	0	0	10
6	2	0	1	0	0	2	1	0	0	6
7	1	1	0	0	0	2	0	0	0	4
8	2	1	4	0	1	4	0	1	0	13
9	3	0	2	0	1	1	0	0	1	8
10	1	2	1	0	0	1	0	0	0	5
11	1	0	0	1	1	2	0	0	0	5
15	2	1	0	2	0	0	0	0	0	5
18	2	0	2	1	1	1	0	1	1	9
20	3	2	1	0	2	2	0	0	1	11
22	2	1	1	0	1	3	0	0	1	9
27	2	0	1	1	0	3	0	0	0	7
28	1	0	2	0	0	2	1	0	1	7
29	1	1	0	0	0	2	0	0	0	4
34	1	2	1	0	2	1	0	1	0	8
35	1	0	0	1	1	0	1	0	1	5
36	2	1	1	0	1	0	0	2	0	7
37	1	2	1	0	0	0	0	0	0	4
38	2	1	2	0	1	1	0	3	0	10
41	3	1	1	3	1	1	1	0	1	12
42	1	1	0	3	1	3	1	1	1	12
43	0	3	0	2	0	1	0	0	0	6
46	1	2	2	1	1	2	0	1	1	11
50	2	2	2	1	0	0	0	1	0	8
51	3	1	0	0	0	0	0	1	0	5
52	0	2	2	2	2	1	3	3	1	16
53	2	1	0	0	0	0	0	1	1	5
55	2	1	1	1	1	1	0	1	0	8
56	2	0	1	0	1	1	1	0	0	6
57	2	1	1	0	0	0	1	0	0	5
59	0	1	1	0	2	1	0	0	1	6
60	4	1	0	0	0	3	1	3	0	12
61	0	1	2	1	1	4	0	2	1	12
62	1	1	2	1	1	2	1	1	1	11
63	1	1	0	0	1	0	1	1	1	6
65	2	1	1	0	1	1	0	1	0	7
67	3	1	0	3	0	0	0	0	0	7
68	2	3	0	0	1	1	0	0	0	7
71	3	2	3	0	0	1	0	4	0	13
73	3	1	1	0	0	1	1	0	0	7
80	2	2	1	0	0	0	0	0	2	7
81	2	0	1	1	1	1	0	1	1	8
82	0	3	1	0	1	0	0	3	1	9
83	5	1	2	0	0	2	0	0	1	11
84	2	1	0	1	1	2	0	0	0	7
86	1	2	1	3	0	0	0	0	0	7
90	3	1	1	0	1	2	0	1	0	9
91	0	0	0	1	1	1	1	2	1	7
93	2	1	0	0	1	2	0	2	1	9
94	3	0	1	0	1	0	0	1	1	7
95	3	0	0	1	0	0	1	1	1	7
96	0	4	2	0	1	2	0	3	1	13
97	3	2	1	0	0	2	0	0	1	9
99	1	2	2	0	1	0	0	0	0	6
100	2	1	1	1	1	1	0	1	0	8
102	1	1	1	0	1	2	0	0	1	7
107	1	2	1	1	0	3	0	1	1	10
109	3	1	0	0	0	2	0	0	0	6
112	1	2	1	1	1	1	0	1	1	9
113	3	1	2	1	1	0	0	0	0	8
114	2	2	1	1	0	2	1	1	0	10
115	1	2	0	0	1	1	0	1	0	6
118	2	2	1	0	0	1	0	1	0	7
120	1	1	1	0	0	0	0	1	0	4
128	1	0	1	1	0	2	0	0	0	5
129	1	3	1	0	0	1	0	0	0	6
130	1	0	2	4	1	1	0	0	0	9
131	2	2	0	0	1	0	1	1	0	7
133	2	0	1	0	1	2	0	0	1	7
134	2	1	2	0	0	1	0	3	0	9
138	2	1	0	0	1	0	0	2	0	6
139	1	0	1	1	1	4	1	0	1	10
140	1	1	0	0	2	2	0	1	0	7
141	3	1	1	1	1	0	0	0	1	8
142	3	3	1	1	1	1	0	1	0	11
143	1	1	1	1	1	1	0	0	1	7
146	1	2	1	1	1	0	0	3	0	9
147	1	2	3	1	0	0	0	0	0	7
148	2	2	0	1	1	0	2	0	1	9
149	0	1	3	1	0	2	0	1	0	8
150	3	3	1	1	1	1	0	3	0	13
153	1	0	1	1	1	1	1	1	1	8
154	0	1	2	0	0	1	0	2	0	6
157	4	2	0	0	0	1	0	1	0	8
162	2	2	0	0	1	1	0	0	0	6
163	1	2	1	0	0	1	0	1	1	7
164	3	2	0	0	0	0	0	3	0	8
170	0	1	2	1	0	0	0	0	0	4
172	1	2	1	0	0	1	1	0	0	6
173	2	2	1	3	0	1	0	0	0	9
174	1	0	1	1	1	3	0	1	0	8
175	2	5	0	1	0	1	0	6	0	15
176	2	2	1	0	1	1	0	1	0	8
177	4	2	2	1	1	2	0	0	1	13
178	2	1	1	1	0	0	0	0	0	5
183	5	2	0	1	1	4	0	1	0	14
185	3	1	1	3	0	0	0	1	0	9
186	2	0	2	0	1	0	0	0	0	5
187	3	1	1	3	1	3	1	0	1	14
189	1	1	2	0	1	0	1	1	0	7
191	1	2	1	1	0	1	0	1	1	8
193	1	1	1	1	0	3	0	0	0	7
195	2	1	1	0	0	3	1	3	0	11
196	2	0	0	0	0	2	0	3	0	7
197	3	0	1	2	0	0	0	1	0	7
198	1	0	2	2	0	2	1	0	1	9
199	4	1	1	1	1	1	0	0	0	9
200	2	1	0	0	0	1	0	1	0	5
202	1	2	0	1	1	2	0	0	1	8
Sum	198	139	111	75	67	133	27	93	41	884
Mean	1.8	1.26364	1.00909	0.681818	0.609091	1.20909	0.245455	0.845455	0.372727	8.04

## Sheet: Table S2
Table S2. Crossovers and lengths of nine chromosomes in L. edodes
Chromosomes	Physical length (Kb)	Number of crossovers
chr1	6297.8	198
chr2	5626.9	139
chr3	5000	111
chr4	4198.8	75
chr5	3809	67
chr6	3574.5	133
chr7	3489	27
chr8	3269.4	93
chr9	1962.5	41
sum	37228	884

## Sheet: Table S3
Table S3. Distribution of crossover hotspot regions in L. edodes genome
Crossover hotspot ID	Chromosome	Start position (bp)	End position (bp)	Number of crossovers
Hotspot1	chr1	270000	280000	9
Hotspot2	chr1	280000	290000	21
Hotspot3	chr1	290000	300000	8
Hotspot4	chr1	1110000	1120000	26
Hotspot5	chr1	1260000	1270000	4
Hotspot6	chr1	1270000	1280000	9
Hotspot7	chr1	1280000	1290000	4
Hotspot8	chr1	1300000	1310000	9
Hotspot9	chr1	1320000	1330000	5
Hotspot10	chr1	2520000	2530000	26
Hotspot11	chr1	3970000	3980000	4
Hotspot12	chr1	4000000	4010000	17
Hotspot13	chr1	4170000	4180000	6
Hotspot14	chr1	4180000	4190000	7
Hotspot15	chr1	4190000	4200000	5
Hotspot16	chr2	90000	100000	7
Hotspot17	chr2	300000	310000	16
Hotspot18	chr2	3200000	3210000	10
Hotspot19	chr2	3240000	3250000	8
Hotspot20	chr2	3250000	3260000	17
Hotspot21	chr2	4540000	4550000	6
Hotspot22	chr2	4550000	4560000	23
Hotspot23	chr2	4570000	4580000	4
Hotspot24	chr3	890000	900000	5
Hotspot25	chr3	900000	910000	9
Hotspot26	chr3	920000	930000	27
Hotspot27	chr3	1540000	1550000	6
Hotspot28	chr3	1550000	1560000	5
Hotspot29	chr3	3110000	3120000	5
Hotspot30	chr3	3120000	3130000	13
Hotspot31	chr3	4600000	4610000	16
Hotspot32	chr4	780000	790000	8
Hotspot33	chr4	790000	800000	14
Hotspot34	chr4	910000	920000	6
Hotspot35	chr4	920000	930000	4
Hotspot36	chr4	1200000	1210000	6
Hotspot37	chr4	1210000	1220000	6
Hotspot38	chr4	3180000	3190000	6
Hotspot39	chr4	3190000	3200000	5
Hotspot40	chr5	250000	260000	9
Hotspot41	chr5	930000	940000	4
Hotspot42	chr5	1980000	1990000	9
Hotspot43	chr5	2020000	2030000	14
Hotspot44	chr5	2860000	2870000	4
Hotspot45	chr6	200000	210000	7
Hotspot46	chr6	210000	220000	7
Hotspot47	chr6	860000	870000	21
Hotspot48	chr6	880000	890000	4
Hotspot49	chr6	1120000	1130000	12
Hotspot50	chr6	1130000	1140000	11
Hotspot51	chr6	2550000	2560000	22
Hotspot52	chr6	2970000	2980000	14
Hotspot53	chr8	340000	350000	11
Hotspot54	chr8	470000	480000	4
Hotspot55	chr8	740000	750000	5
Hotspot56	chr8	750000	760000	17
Hotspot57	chr8	810000	820000	6
Hotspot58	chr8	1060000	1070000	13
Hotspot59	chr8	1370000	1380000	6
Hotspot60	chr8	3260000	3270000	4
Hotspot61	chr9	190000	200000	4
Hotspot62	chr9	290000	300000	14
Hotspot63	chr9	300000	310000	4
Hotspot64	chr9	680000	690000	9
Hotspot65	chr9	690000	700000	5

## Sheet: Table S4
Table S4. Associations of corssovers and genes regulating fruiting body-related traits
Trait	Gene ID	r	p-value	Functional description	Regulated fruiting body-related traits
HCO	jgi.p|Lenedo1|1032489	-0.280881	0.00295542	homeodomain protein	PD
HCO	jgi.p|Lenedo1|1043151	-0.25519	0.00713278	e3 ubiquitin-protein ligase rnf13-like	PD,SD
HCO	jgi.p|Lenedo1|1053593	0.243342	0.0104172	predicted protein	SD
HCO	jgi.p|Lenedo1|1064990	-0.25653	0.00682635	glycopeptide	FP
HCO	jgi.p|Lenedo1|1072094	0.249589	0.00854945	predicted protein	SD
HCO	jgi.p|Lenedo1|1072901	-0.19199	0.0445009	predicted protein	PD,PW
HCO	jgi.p|Lenedo1|1077098	0.192986	0.0433867	f1 atpase assembly protein 11	PD
HCO	jgi.p|Lenedo1|1077104	0.283194	0.00271885	hypothetical protein LENED_010400	PD,NF
HCO	jgi.p|Lenedo1|1077649	-0.271464	0.00412171	HCP-like protein	FP,PD,NF
HCO	jgi.p|Lenedo1|1101127	-0.227529	0.016824	heme oxygenase	SD
HCO	jgi.p|Lenedo1|1114161	-0.232047	0.0147149	pyruvate decarboxylase	PD,SD
HCO	jgi.p|Lenedo1|1120765	-0.215837	0.0235358	predicted protein	PW,PD,WF
HCO	jgi.p|Lenedo1|1138324	-0.223161	0.0191073	spindle pole body protein	PD
HCO	jgi.p|Lenedo1|1152243	0.266773	0.00484414	predicted protein	PW
HCO	jgi.p|Lenedo1|1164636	-0.2158	0.0235603	extracellular triacylglycerol lipase precursor	FP,PD,NF
HCO	jgi.p|Lenedo1|1164697	0.22363	0.0188499	predicted protein	FP
HCO	jgi.p|Lenedo1|1172888	0.22811	0.0165391	predicted protein	PW
HCO	jgi.p|Lenedo1|1172908	-0.201148	0.0351051	predicted protein	PW,WF
HCO	jgi.p|Lenedo1|1174287	-0.216239	0.023272	FTHFS-domain-containing protein	SL,WF
HCO	jgi.p|Lenedo1|1237765	-0.24735	0.00918197	histone deacetylase complex subunit cti6	SD
HCO	jgi.p|Lenedo1|1239438	0.204127	0.0324335	predicted protein	SD
HCO	jgi.p|Lenedo1|157132	-0.224043	0.0186261	predicted protein	SD
HCO	jgi.p|Lenedo1|201149	-0.198723	0.0374142	monocarboxylate permease-like protein	SD
HCO	jgi.p|Lenedo1|209766	-0.194902	0.0413092	APC amino acid permease	SD
HCO	jgi.p|Lenedo1|23510	0.228606	0.0162989	predicted protein	FP
HCO	jgi.p|Lenedo1|24582	-0.196685	0.0394518	GroES-like protein	PD
HCO	jgi.p|Lenedo1|26445	-0.25881	0.00633158	other/FunK1 protein kinase	FP,PD,NF
HCO	jgi.p|Lenedo1|26471	0.193997	0.0422799	myb3r transcription factor	PD
TCO	jgi.p|Lenedo1|1032489	-0.248488	0.00885542	homeodomain protein	PD
TCO	jgi.p|Lenedo1|1050636	-0.199381	0.0367752	phospholipase D	PW,PD,SD,WF
TCO	jgi.p|Lenedo1|1064990	-0.258735	0.00634735	glycopeptide	FP
TCO	jgi.p|Lenedo1|1072901	-0.255948	0.00695804	predicted protein	PD,PW
TCO	jgi.p|Lenedo1|1077649	-0.197716	0.0384096	HCP-like protein	FP,PD,NF
TCO	jgi.p|Lenedo1|1114374	0.214323	0.0245539	MFS general substrate transporter	SD
TCO	jgi.p|Lenedo1|1120765	-0.244627	0.010006	predicted protein	PW,PD,WF
TCO	jgi.p|Lenedo1|1152243	0.216361	0.0231925	predicted protein	PW
TCO	jgi.p|Lenedo1|1161804	-0.212084	0.0261271	POP1-domain-containing protein	PW,PD,SD,WF
TCO	jgi.p|Lenedo1|1161854	-0.280534	0.00299257	short-chain dehydrogenase reductase family	PW,PD,SD,WF
TCO	jgi.p|Lenedo1|1164636	-0.210194	0.0275217	extracellular triacylglycerol lipase precursor	FP,PD,NF
TCO	jgi.p|Lenedo1|1164697	0.293868	0.00183316	predicted protein	FP
TCO	jgi.p|Lenedo1|1199109	-0.202319	0.0340333	kinase-like protein	WF
TCO	jgi.p|Lenedo1|1206258	-0.230525	0.0153983	WD40 repeat-like protein	PW,PD,PT,SL,WF
TCO	jgi.p|Lenedo1|1235655	-0.20757	0.0295629	hypothetical protein LENED_004018	PT
TCO	jgi.p|Lenedo1|23510	0.202691	0.0336992	predicted protein	FP
TCO	jgi.p|Lenedo1|24644	-0.202959	0.03346	dna cytosine-5 methyltransferase	FP,NF
TCO	jgi.p|Lenedo1|26445	-0.235144	0.0134053	other/FunK1 protein kinase	FP,PD,NF
TCO	jgi.p|Lenedo1|540507	0.219817	0.0210313	extracellular serine-rich	PW,PD,WF
Note: PD: pileus diameter; PT: pileus thickness; PW: pileus weight; SL: stipe length; SD: stipe diameter; SW: stipe weight; WF: weight of a single fruiting body; NF: number of fruiting bodies of single bag; FP: fruiting bodies precocity.

## Sheet: Table S5
Table S5. Genes in confidence interval of QTLs for crossover variation in L.edodes
QTL ID	Chromosome	CI_L (cM)	CI_R (cM)	CI_L_physical (bp)	CI_R_physical (bp)	Length(bp)	Gene name	Gene start	Gene end	Gene function
cochr1.1	chr1	81.9	90.2	1301366	1330770	29404	jgi.p|Lenedo1|1066268	1328858	1329862	hypothetical protein LENED_004312
cochr1.1	chr1	81.9	90.2	1301366	1330770	29404	jgi.p|Lenedo1|1066269	1326321	1327540	nicotinamide N-methyltransferase
cochr1.1	chr1	81.9	90.2	1301366	1330770	29404	jgi.p|Lenedo1|1066270	1309914	1311300	hypothetical protein GYMLUDRAFT_56662
cochr1.1	chr1	81.9	90.2	1301366	1330770	29404	jgi.p|Lenedo1|1005150	1308516	1308958	vegetative incompatibility protein HET-E-1
cochr1.1	chr1	81.9	90.2	1301366	1330770	29404	jgi.p|Lenedo1|1084908	1306506	1307408	hypothetical protein LENED_004319
cochr1.1	chr1	81.9	90.2	1301366	1330770	29404	jgi.p|Lenedo1|1066272	1300307	1301476	dicarboxylic acid transporter
cochr2.1	chr1	152.5	158.2	4172301	4181822	9521	jgi.p|Lenedo1|1247831	4179655	4185306	uv-damaged dna-binding
cochr2.1	chr1	152.5	158.2	4172301	4181822	9521	jgi.p|Lenedo1|1143657	4178585	4179642	hypothetical protein LENED_003996
cochr2.1	chr1	152.5	158.2	4172301	4181822	9521	jgi.p|Lenedo1|1012381	4176525	4178012	COMPASS complex protein
cochr2.1	chr1	152.5	158.2	4172301	4181822	9521	jgi.p|Lenedo1|1067686	4173823	4175567	predicted protein
cochr2.1	chr1	152.5	158.2	4172301	4181822	9521	jgi.p|Lenedo1|895665	4171553	4172593	hypothetical protein FIBSPDRAFT_240569
cochr2.2	chr1	160.6	164.3	4188404	4190375	1971	jgi.p|Lenedo1|895544	4189694	4190351	rba2 protein
cochr2.2	chr1	160.6	164.3	4188404	4190375	1971	jgi.p|Lenedo1|1168190	4187608	4189634	predicted protein
cochr2.3	chr8	0	6.8	272408	475446	203038	jgi.p|Lenedo1|1040554	355086	355694	DNA-binding domain of Mlu1-box binding protein MBP1
cochr2.3	chr8	0	6.8	272408	475446	203038	jgi.p|Lenedo1|1095738	356918	358356	hypothetical protein LENED_005989
cochr2.3	chr8	0	6.8	272408	475446	203038	jgi.p|Lenedo1|1040969	360470	361326	predicted protein
cochr2.3	chr8	0	6.8	272408	475446	203038	jgi.p|Lenedo1|1095744	361519	364409	hypothetical protein GYMLUDRAFT_238593
cochr2.3	chr8	0	6.8	272408	475446	203038	jgi.p|Lenedo1|1095746	364381	365080	predicted protein
cochr2.3	chr8	0	6.8	272408	475446	203038	jgi.p|Lenedo1|1068059	365794	366434	predicted protein
cochr2.3	chr8	0	6.8	272408	475446	203038	jgi.p|Lenedo1|1068060	366735	369556	Protein dopey
cochr2.3	chr8	0	6.8	272408	475446	203038	jgi.p|Lenedo1|1068061	372522	375663	---NA---
cochr2.3	chr8	0	6.8	272408	475446	203038	jgi.p|Lenedo1|1182214	377726	381411	glycosyltransferase family 2 protein
cochr2.3	chr8	0	6.8	272408	475446	203038	jgi.p|Lenedo1|1040890	381911	383278	ATP dependent helicase
cochr2.3	chr8	0	6.8	272408	475446	203038	jgi.p|Lenedo1|1159776	384303	385336	alpha beta-hydrolase
cochr2.3	chr8	0	6.8	272408	475446	203038	jgi.p|Lenedo1|1068065	389253	390521	L-glutamine D-fructose 6-phosphate amidotansferase
cochr2.3	chr8	0	6.8	272408	475446	203038	jgi.p|Lenedo1|1068066	390812	392412	---NA---
cochr2.3	chr8	0	6.8	272408	475446	203038	jgi.p|Lenedo1|1264107	396521	399245	nuclear export factor
cochr2.3	chr8	0	6.8	272408	475446	203038	jgi.p|Lenedo1|1264108	400357	402939	MATE efflux family protein
cochr2.3	chr8	0	6.8	272408	475446	203038	jgi.p|Lenedo1|1182268	403176	404002	MATE efflux family protein
cochr2.3	chr8	0	6.8	272408	475446	203038	jgi.p|Lenedo1|1168729	475019	475795	hypothetical protein LENED_011210
cochr2.3	chr8	0	6.8	272408	475446	203038	jgi.p|Lenedo1|858542	343334	345002	phosphotransferase enzyme family protein
cochr2.3	chr8	0	6.8	272408	475446	203038	jgi.p|Lenedo1|858530	334924	343560	P-loop containing nucleoside triphosphate hydrolase protein
cochr2.3	chr8	0	6.8	272408	475446	203038	jgi.p|Lenedo1|1241840	333127	334872	predicted protein
cochr2.3	chr8	0	6.8	272408	475446	203038	jgi.p|Lenedo1|1136326	330401	333592	MFS general substrate transporter
cochr2.3	chr8	0	6.8	272408	475446	203038	jgi.p|Lenedo1|1178269	326903	329411	amino-acid permease inda1
cochr2.3	chr8	0	6.8	272408	475446	203038	jgi.p|Lenedo1|1178270	324993	326188	predicted protein
cochr2.3	chr8	0	6.8	272408	475446	203038	jgi.p|Lenedo1|1136338	322371	324856	snf 1
cochr2.3	chr8	0	6.8	272408	475446	203038	jgi.p|Lenedo1|859159	320299	322267	c2h2 conidiation transcription factor
cochr2.3	chr8	0	6.8	272408	475446	203038	jgi.p|Lenedo1|859160	318714	320298	2 -5 RNA ligase
cochr2.3	chr8	0	6.8	272408	475446	203038	jgi.p|Lenedo1|1010196	318116	318556	predicted protein
cochr2.3	chr8	0	6.8	272408	475446	203038	jgi.p|Lenedo1|1000282	315574	316355	hypothetical protein LENED_000081
cochr2.3	chr8	0	6.8	272408	475446	203038	jgi.p|Lenedo1|1062959	313576	314260	predicted protein
cochr2.3	chr8	0	6.8	272408	475446	203038	jgi.p|Lenedo1|859790	311898	313223	predicted protein
cochr2.3	chr8	0	6.8	272408	475446	203038	jgi.p|Lenedo1|1075130	310200	311292	predicted protein
cochr2.3	chr8	0	6.8	272408	475446	203038	jgi.p|Lenedo1|1178279	306822	307653	DUF1000-domain-containing protein
cochr2.3	chr8	0	6.8	272408	475446	203038	jgi.p|Lenedo1|1136418	304459	306464	Clavaminate synthase-like protein
cochr2.3	chr8	0	6.8	272408	475446	203038	jgi.p|Lenedo1|859883	302348	303682	hypothetical protein LENED_000090
cochr2.3	chr8	0	6.8	272408	475446	203038	jgi.p|Lenedo1|1178282	300433	301321	predicted protein
cochr2.3	chr8	0	6.8	272408	475446	203038	jgi.p|Lenedo1|1223668	297189	300273	MFS general substrate transporter
cochr2.3	chr8	0	6.8	272408	475446	203038	jgi.p|Lenedo1|1136454	294602	296699	hypothetical protein LENED_000093
cochr2.3	chr8	0	6.8	272408	475446	203038	jgi.p|Lenedo1|1178285	292085	293875	hypothetical protein LENED_000094
cochr2.3	chr8	0	6.8	272408	475446	203038	jgi.p|Lenedo1|860383	290177	291043	---NA---
cochr2.3	chr8	0	6.8	272408	475446	203038	jgi.p|Lenedo1|1075138	288434	289752	---NA---
cochr2.3	chr8	0	6.8	272408	475446	203038	jgi.p|Lenedo1|1062996	286522	287991	FMN-linked oxidoreductase
cochr2.3	chr8	0	6.8	272408	475446	203038	jgi.p|Lenedo1|1062974	284355	285926	ZIP-like iron-zinc transporter
cochr2.3	chr8	0	6.8	272408	475446	203038	jgi.p|Lenedo1|1075141	282232	283291	hypothetical protein LENED_000097
cochr2.3	chr8	0	6.8	272408	475446	203038	jgi.p|Lenedo1|1136498	280262	281745	hypothetical protein LENED_000098
cochr2.3	chr8	0	6.8	272408	475446	203038	jgi.p|Lenedo1|1136512	278342	280360	zinc finger hit domain-containing protein 2-like
cochr2.3	chr8	0	6.8	272408	475446	203038	jgi.p|Lenedo1|1275363	275588	278290	DEAD-domain-containing protein
cochr3.1	chr2	50.5	56.2	3198053	3203246	5193	jgi.p|Lenedo1|1261516	3193676	3198310	membrane protein
cochr3.1	chr2	50.5	56.2	3198053	3203246	5193	jgi.p|Lenedo1|1164337	3199312	3201823	phospholipase D Active site motif protein
cochr3.2	chr2	74.7	81	3253886	3259457	5571	jgi.p|Lenedo1|1032489	3251681	3254294	homeodomain protein
cochr3.2	chr2	74.7	81	3253886	3259457	5571	jgi.p|Lenedo1|1261534	3255439	3256241	---NA---
cochr3.2	chr2	74.7	81	3253886	3259457	5571	jgi.p|Lenedo1|1064717	3256113	3257083	---NA---
cochr3.2	chr2	74.7	81	3253886	3259457	5571	jgi.p|Lenedo1|4317	3257909	3258630	hypothetical protein LENED_000294
cochr3.2	chr2	74.7	81	3253886	3259457	5571	jgi.p|Lenedo1|1232990	3258790	3263038	beta-flanking protein
cochr3.3	chr2	81.9	87.6	3259457	3981377	721920	jgi.p|Lenedo1|1232990	3258790	3263038	beta-flanking protein
cochr3.3	chr2	81.9	87.6	3259457	3981377	721920	jgi.p|Lenedo1|1164358	3263892	3264360	DUF2945 family
cochr3.3	chr2	81.9	87.6	3259457	3981377	721920	jgi.p|Lenedo1|1164359	3264719	3265929	hypothetical protein LENED_000291
cochr3.3	chr2	81.9	87.6	3259457	3981377	721920	jgi.p|Lenedo1|1157490	3268776	3271857	protein kinase
cochr3.3	chr2	81.9	87.6	3259457	3981377	721920	jgi.p|Lenedo1|1232994	3272170	3273640	Short-chain dehydrogenase reductase SDR
cochr3.3	chr2	81.9	87.6	3259457	3981377	721920	jgi.p|Lenedo1|1031188	3274512	3277618	protein kinase
cochr3.3	chr2	81.9	87.6	3259457	3981377	721920	jgi.p|Lenedo1|1232995	3279165	3280310	hypothetical protein LENED_009753
cochr3.3	chr2	81.9	87.6	3259457	3981377	721920	jgi.p|Lenedo1|1075859	3281953	3284306	f-box domain-containing protein
cochr3.3	chr2	81.9	87.6	3259457	3981377	721920	jgi.p|Lenedo1|1064725	3284387	3285218	putative conserved protein A-HP6
cochr3.3	chr2	81.9	87.6	3259457	3981377	721920	jgi.p|Lenedo1|1269613	3287045	3290184	predicted protein
cochr3.3	chr2	81.9	87.6	3259457	3981377	721920	jgi.p|Lenedo1|1031305	3291129	3292890	RNA polymerase II-associated protein
cochr3.3	chr2	81.9	87.6	3259457	3981377	721920	jgi.p|Lenedo1|1032176	3293497	3296817	glycosyltransferase family 8 protein
cochr3.3	chr2	81.9	87.6	3259457	3981377	721920	jgi.p|Lenedo1|1075884	3296944	3299691	protein kinase
cochr3.3	chr2	81.9	87.6	3259457	3981377	721920	jgi.p|Lenedo1|1164370	3299815	3302309	mitochondrial intermediate peptidase
cochr3.3	chr2	81.9	87.6	3259457	3981377	721920	jgi.p|Lenedo1|5256	3302475	3304813	predicted protein
cochr3.3	chr2	81.9	87.6	3259457	3981377	721920	jgi.p|Lenedo1|1075896	3304823	3305612	DUF1754-domain-containing protein
cochr3.3	chr2	81.9	87.6	3259457	3981377	721920	jgi.p|Lenedo1|1075897	3305614	3307184	eukaryotic integral membrane protein
cochr3.3	chr2	81.9	87.6	3259457	3981377	721920	jgi.p|Lenedo1|1032602	3307682	3310438	Vps51 Vps67 domain-containing protein
cochr3.3	chr2	81.9	87.6	3259457	3981377	721920	jgi.p|Lenedo1|1075906	3310810	3312157	predicted protein
cochr3.3	chr2	81.9	87.6	3259457	3981377	721920	jgi.p|Lenedo1|1164375	3312235	3312924	secE/sec61-gamma protein
cochr3.3	chr2	81.9	87.6	3259457	3981377	721920	jgi.p|Lenedo1|5682	3313015	3315275	pentatricopeptide repeat-containing protein
cochr3.3	chr2	81.9	87.6	3259457	3981377	721920	jgi.p|Lenedo1|4816	3315410	3319488	glycine dehydrogenase
cochr3.3	chr2	81.9	87.6	3259457	3981377	721920	jgi.p|Lenedo1|1164378	3320488	3321091	---NA---
cochr3.3	chr2	81.9	87.6	3259457	3981377	721920	jgi.p|Lenedo1|6908	3322373	3324567	SET domain-containing protein
cochr3.3	chr2	81.9	87.6	3259457	3981377	721920	jgi.p|Lenedo1|1031435	3324502	3325883	clavaminate synthase-like protein
cochr3.3	chr2	81.9	87.6	3259457	3981377	721920	jgi.p|Lenedo1|6219	3325958	3326952	E2 ubiquitin-conjugating enzyme
cochr3.3	chr2	81.9	87.6	3259457	3981377	721920	jgi.p|Lenedo1|1064738	3327062	3327601	transthyretin family protein
cochr3.3	chr2	81.9	87.6	3259457	3981377	721920	jgi.p|Lenedo1|1164382	3327718	3328914	Nop52-domain-containing protein
cochr3.3	chr2	81.9	87.6	3259457	3981377	721920	jgi.p|Lenedo1|1164383	3329003	3329981	f-box domain-containing protein
cochr3.3	chr2	81.9	87.6	3259457	3981377	721920	jgi.p|Lenedo1|1032066	3330384	3332496	f-box domain-containing protein
cochr3.3	chr2	81.9	87.6	3259457	3981377	721920	jgi.p|Lenedo1|1242240	3332515	3334759	Chromatin structure-remodeling complex subunit rsc9
cochr3.3	chr2	81.9	87.6	3259457	3981377	721920	jgi.p|Lenedo1|1233016	3334856	3337503	para-aminobenzoic acid synthetase
cochr3.3	chr2	81.9	87.6	3259457	3981377	721920	jgi.p|Lenedo1|1157508	3337541	3340989	heat repeat protein
cochr3.3	chr2	81.9	87.6	3259457	3981377	721920	jgi.p|Lenedo1|1164388	3341017	3342469	deoxycytidylate deaminase
cochr3.3	chr2	81.9	87.6	3259457	3981377	721920	jgi.p|Lenedo1|1075943	3342516	3343748	ribonucleases p mrp protein subunit pop3 kda subunit
cochr3.3	chr2	81.9	87.6	3259457	3981377	721920	jgi.p|Lenedo1|1032214	3343994	3345440	E set domain-containing protein
cochr3.3	chr2	81.9	87.6	3259457	3981377	721920	jgi.p|Lenedo1|7048	3345047	3347035	E set domain-containing
cochr3.3	chr2	81.9	87.6	3259457	3981377	721920	jgi.p|Lenedo1|1075955	3348644	3349658	predicted protein
cochr3.3	chr2	81.9	87.6	3259457	3981377	721920	jgi.p|Lenedo1|7131	3349724	3350273	---NA---
cochr3.3	chr2	81.9	87.6	3259457	3981377	721920	jgi.p|Lenedo1|7130	3350274	3351793	hypothetical protein LENED_000254
cochr3.3	chr2	81.9	87.6	3259457	3981377	721920	jgi.p|Lenedo1|1064745	3352386	3353899	DUF605-domain-containing protein
cochr3.3	chr2	81.9	87.6	3259457	3981377	721920	jgi.p|Lenedo1|7147	3355801	3356976	predicted protein
cochr3.3	chr2	81.9	87.6	3259457	3981377	721920	jgi.p|Lenedo1|1157509	3357095	3358078	Rhamnogalacturonan acetylesterase
cochr3.3	chr2	81.9	87.6	3259457	3981377	721920	jgi.p|Lenedo1|1075977	3358249	3360793	P-loop containing nucleoside triphosphate hydrolase protein
cochr3.3	chr2	81.9	87.6	3259457	3981377	721920	jgi.p|Lenedo1|1075978	3360835	3363098	S-adenosyl-L-methionine-dependent methyltransferase
cochr3.3	chr2	81.9	87.6	3259457	3981377	721920	jgi.p|Lenedo1|1164396	3363185	3366456	WD40 repeat-like protein
cochr3.3	chr2	81.9	87.6	3259457	3981377	721920	jgi.p|Lenedo1|1064749	3366781	3368661	predicted protein
cochr3.3	chr2	81.9	87.6	3259457	3981377	721920	jgi.p|Lenedo1|1075989	3369787	3372624	putative NAD(P)H-dependent D-xylose reductase xyl1
cochr3.3	chr2	81.9	87.6	3259457	3981377	721920	jgi.p|Lenedo1|1164399	3373455	3374504	LmbE-like protein
cochr3.3	chr2	81.9	87.6	3259457	3981377	721920	jgi.p|Lenedo1|7374	3374569	3376354	Aldo/keto reductase
cochr3.3	chr2	81.9	87.6	3259457	3981377	721920	jgi.p|Lenedo1|8426	3376356	3378425	putative 2-dehydropantoate 2-reductase
cochr3.3	chr2	81.9	87.6	3259457	3981377	721920	jgi.p|Lenedo1|1076000	3378382	3379930	ketopantoate reductase-like protein
cochr3.3	chr2	81.9	87.6	3259457	3981377	721920	jgi.p|Lenedo1|1076007	3380580	3383138	putative O-fucosyltransferase-like protein
cochr3.3	chr2	81.9	87.6	3259457	3981377	721920	jgi.p|Lenedo1|1164404	3383108	3384561	putative triose-phosphate transporter
cochr3.3	chr2	81.9	87.6	3259457	3981377	721920	jgi.p|Lenedo1|8684	3384912	3387712	putative 15-O-acetyltransferase Tri3
cochr3.3	chr2	81.9	87.6	3259457	3981377	721920	jgi.p|Lenedo1|1032571	3387706	3389906	tbc1 domain family member 14
cochr3.3	chr2	81.9	87.6	3259457	3981377	721920	jgi.p|Lenedo1|1076027	3389940	3392392	gamma-tubulin ring complex protein
cochr3.3	chr2	81.9	87.6	3259457	3981377	721920	jgi.p|Lenedo1|1031216	3392662	3393861	inorganic diphosphatase
cochr3.3	chr2	81.9	87.6	3259457	3981377	721920	jgi.p|Lenedo1|1031373	3394132	3398633	predicted protein
cochr3.3	chr2	81.9	87.6	3259457	3981377	721920	jgi.p|Lenedo1|1076034	3398757	3400310	ribonuclease iii
cochr3.3	chr2	81.9	87.6	3259457	3981377	721920	jgi.p|Lenedo1|1076038	3400311	3401334	thioredoxin-domain-containing protein
cochr3.3	chr2	81.9	87.6	3259457	3981377	721920	jgi.p|Lenedo1|1064762	3401549	3402688	elegans protein confirmed by transcript evidence
cochr3.3	chr2	81.9	87.6	3259457	3981377	721920	jgi.p|Lenedo1|9820	3404213	3406429	predicted protein
cochr3.3	chr2	81.9	87.6	3259457	3981377	721920	jgi.p|Lenedo1|1032224	3406705	3409071	glycosyltransferase family 22 protein
cochr3.3	chr2	81.9	87.6	3259457	3981377	721920	jgi.p|Lenedo1|9863	3409075	3410468	predicted protein
cochr3.3	chr2	81.9	87.6	3259457	3981377	721920	jgi.p|Lenedo1|9769	3411091	3414198	Protein polybromo-1
cochr3.3	chr2	81.9	87.6	3259457	3981377	721920	jgi.p|Lenedo1|1164416	3414411	3416624	hypothetical protein LENED_000225
cochr3.3	chr2	81.9	87.6	3259457	3981377	721920	jgi.p|Lenedo1|9021	3416628	3418898	palmitoyltransferase pfa4
cochr3.3	chr2	81.9	87.6	3259457	3981377	721920	jgi.p|Lenedo1|1164418	3418771	3420040	hypothetical protein LENED_000222
cochr3.3	chr2	81.9	87.6	3259457	3981377	721920	jgi.p|Lenedo1|1164419	3420265	3422506	hypothetical protein LENED_000221
cochr3.3	chr2	81.9	87.6	3259457	3981377	721920	jgi.p|Lenedo1|1261578	3422611	3425865	hypothetical protein LENED_000219
cochr3.3	chr2	81.9	87.6	3259457	3981377	721920	jgi.p|Lenedo1|1233047	3425876	3427993	NAF1-domain-containing protein
cochr3.3	chr2	81.9	87.6	3259457	3981377	721920	jgi.p|Lenedo1|1164422	3428107	3429075	elongation factor Ts, mitochondrial
cochr3.3	chr2	81.9	87.6	3259457	3981377	721920	jgi.p|Lenedo1|1164424	3429665	3430828	predicted protein
cochr3.3	chr2	81.9	87.6	3259457	3981377	721920	jgi.p|Lenedo1|1064772	3431046	3431638	predicted protein
cochr3.3	chr2	81.9	87.6	3259457	3981377	721920	jgi.p|Lenedo1|9703	3432184	3433646	alkaline phytoceramidase
cochr3.3	chr2	81.9	87.6	3259457	3981377	721920	jgi.p|Lenedo1|10120	3434205	3436026	hypothetical protein LENED_000214
cochr3.3	chr2	81.9	87.6	3259457	3981377	721920	jgi.p|Lenedo1|9889	3436309	3437276	hypothetical protein GYMLUDRAFT_65867
cochr3.3	chr2	81.9	87.6	3259457	3981377	721920	jgi.p|Lenedo1|1164428	3437665	3438641	hypothetical protein LENED_000213
cochr3.3	chr2	81.9	87.6	3259457	3981377	721920	jgi.p|Lenedo1|10359	3438722	3439386	---NA---
cochr3.3	chr2	81.9	87.6	3259457	3981377	721920	jgi.p|Lenedo1|1076118	3439066	3442118	alpha/beta-hydrolase
cochr3.3	chr2	81.9	87.6	3259457	3981377	721920	jgi.p|Lenedo1|1064778	3442178	3443921	mitochondrial processing peptidase
cochr3.3	chr2	81.9	87.6	3259457	3981377	721920	jgi.p|Lenedo1|1032221	3444315	3445844	udp-n-acetylglucosamine diphosphorylase
cochr3.3	chr2	81.9	87.6	3259457	3981377	721920	jgi.p|Lenedo1|10304	3445975	3448282	predicted protein
cochr3.3	chr2	81.9	87.6	3259457	3981377	721920	jgi.p|Lenedo1|1032258	3450644	3452484	rad51-associated protein brh2
cochr3.3	chr2	81.9	87.6	3259457	3981377	721920	jgi.p|Lenedo1|10644	3452925	3453748	Lanosterol synthase
cochr3.3	chr2	81.9	87.6	3259457	3981377	721920	jgi.p|Lenedo1|1076140	3456180	3458001	mitochondrial carrier
cochr3.3	chr2	81.9	87.6	3259457	3981377	721920	jgi.p|Lenedo1|1076144	3458002	3462492	PhoX domain-containing protein
cochr3.3	chr2	81.9	87.6	3259457	3981377	721920	jgi.p|Lenedo1|10651	3462133	3462569	Gcd10p-domain-containing protein
cochr3.3	chr2	81.9	87.6	3259457	3981377	721920	jgi.p|Lenedo1|1076147	3462493	3464056	Gcd10p-domain-containing protein
cochr3.3	chr2	81.9	87.6	3259457	3981377	721920	jgi.p|Lenedo1|1164437	3464112	3470968	microfilament motor
cochr3.3	chr2	81.9	87.6	3259457	3981377	721920	jgi.p|Lenedo1|1064786	3471900	3472901	aromatic compound dioxygenase
cochr3.3	chr2	81.9	87.6	3259457	3981377	721920	jgi.p|Lenedo1|1076166	3473160	3475090	predicted protein
cochr3.3	chr2	81.9	87.6	3259457	3981377	721920	jgi.p|Lenedo1|1076168	3475091	3476306	Lumazine-binding protein
cochr3.3	chr2	81.9	87.6	3259457	3981377	721920	jgi.p|Lenedo1|1076169	3476308	3478370	predicted protein
cochr3.3	chr2	81.9	87.6	3259457	3981377	721920	jgi.p|Lenedo1|1076172	3478378	3481680	bar domain-containing protein
cochr3.3	chr2	81.9	87.6	3259457	3981377	721920	jgi.p|Lenedo1|1164443	3481931	3485194	rho guanine nucleotide exchange factor 17
cochr3.3	chr2	81.9	87.6	3259457	3981377	721920	jgi.p|Lenedo1|1164445	3487285	3488088	aminodeoxychorismate lyase
cochr3.3	chr2	81.9	87.6	3259457	3981377	721920	jgi.p|Lenedo1|1031817	3488129	3491141	u3 small nucleolar rna-associated protein
cochr3.3	chr2	81.9	87.6	3259457	3981377	721920	jgi.p|Lenedo1|1157540	3491420	3492684	predicted protein
cochr3.3	chr2	81.9	87.6	3259457	3981377	721920	jgi.p|Lenedo1|1032587	3492994	3497136	predicted protein
cochr3.3	chr2	81.9	87.6	3259457	3981377	721920	jgi.p|Lenedo1|1242319	3497404	3498834	NIPSNAP-domain-containing protein
cochr3.3	chr2	81.9	87.6	3259457	3981377	721920	jgi.p|Lenedo1|1076224	3498835	3500666	predicted protein
cochr3.3	chr2	81.9	87.6	3259457	3981377	721920	jgi.p|Lenedo1|1157542	3500781	3503004	molybdenum cofactor biosynthesis prote
cochr3.3	chr2	81.9	87.6	3259457	3981377	721920	jgi.p|Lenedo1|1164451	3503113	3503627	duf953 domain protein
cochr3.3	chr2	81.9	87.6	3259457	3981377	721920	jgi.p|Lenedo1|1164452	3504398	3506635	predicted protein
cochr3.3	chr2	81.9	87.6	3259457	3981377	721920	jgi.p|Lenedo1|1031227	3507199	3510309	mitochondrial inner membrane protein
cochr3.3	chr2	81.9	87.6	3259457	3981377	721920	jgi.p|Lenedo1|1076244	3510421	3512486	trna methyltransferase trm5
cochr3.3	chr2	81.9	87.6	3259457	3981377	721920	jgi.p|Lenedo1|1031774	3512621	3513763	TatD DNase family Scn1
cochr3.3	chr2	81.9	87.6	3259457	3981377	721920	jgi.p|Lenedo1|1031548	3513823	3514749	V-snare-domain-containing protein
cochr3.3	chr2	81.9	87.6	3259457	3981377	721920	jgi.p|Lenedo1|1076251	3515380	3519729	wd40 containing snare-dependent exocytosis protein
cochr3.3	chr2	81.9	87.6	3259457	3981377	721920	jgi.p|Lenedo1|13411	3523831	3525099	---NA---
cochr3.3	chr2	81.9	87.6	3259457	3981377	721920	jgi.p|Lenedo1|13465	3524705	3525761	---NA---
cochr3.3	chr2	81.9	87.6	3259457	3981377	721920	jgi.p|Lenedo1|1157547	3525545	3527406	predicted protein
cochr3.3	chr2	81.9	87.6	3259457	3981377	721920	jgi.p|Lenedo1|1179547	3529703	3535574	P-loop containing nucleoside triphosphate hydrolase protein
cochr3.3	chr2	81.9	87.6	3259457	3981377	721920	jgi.p|Lenedo1|1076290	3535675	3536713	atp-binding cassette transporter
cochr3.3	chr2	81.9	87.6	3259457	3981377	721920	jgi.p|Lenedo1|1064802	3537407	3538124	pleiotropic drug resistance ABC transporter
cochr3.3	chr2	81.9	87.6	3259457	3981377	721920	jgi.p|Lenedo1|1032523	3538965	3544007	P-loop containing nucleoside triphosphate hydrolase protein
cochr3.3	chr2	81.9	87.6	3259457	3981377	721920	jgi.p|Lenedo1|1076303	3544079	3547872	ATP-dependent RNA helicase DHX8
cochr3.3	chr2	81.9	87.6	3259457	3981377	721920	jgi.p|Lenedo1|1076305	3547868	3548599	NTF2-like protein
cochr3.3	chr2	81.9	87.6	3259457	3981377	721920	jgi.p|Lenedo1|1138148	3548655	3550685	peptidase M24A, methionine aminopeptidase
cochr3.3	chr2	81.9	87.6	3259457	3981377	721920	jgi.p|Lenedo1|13855	3550486	3553281	predicted protein
cochr3.3	chr2	81.9	87.6	3259457	3981377	721920	jgi.p|Lenedo1|1032008	3553337	3554897	inositol phosphophingolipids phospholipase C
cochr3.3	chr2	81.9	87.6	3259457	3981377	721920	jgi.p|Lenedo1|13962	3554972	3557688	FAD/NAD-P-binding domain-containing protein
cochr3.3	chr2	81.9	87.6	3259457	3981377	721920	jgi.p|Lenedo1|1164470	3557573	3561818	predicted protein
cochr3.3	chr2	81.9	87.6	3259457	3981377	721920	jgi.p|Lenedo1|1269668	3561959	3564221	Exonuclease V
cochr3.3	chr2	81.9	87.6	3259457	3981377	721920	jgi.p|Lenedo1|1076327	3564223	3565360	copper transporter
cochr3.3	chr2	81.9	87.6	3259457	3981377	721920	jgi.p|Lenedo1|1164473	3565443	3569383	predicted protein
cochr3.3	chr2	81.9	87.6	3259457	3981377	721920	jgi.p|Lenedo1|1164474	3569571	3571457	NAD-P-binding protein
cochr3.3	chr2	81.9	87.6	3259457	3981377	721920	jgi.p|Lenedo1|1164475	3571594	3572172	Endoribonuclease L-PSP
cochr3.3	chr2	81.9	87.6	3259457	3981377	721920	jgi.p|Lenedo1|1076338	3573180	3576015	general substrate transporter
cochr3.3	chr2	81.9	87.6	3259457	3981377	721920	jgi.p|Lenedo1|1031864	3576752	3577073	hypothetical protein LENED_000162
cochr3.3	chr2	81.9	87.6	3259457	3981377	721920	jgi.p|Lenedo1|1157563	3577869	3580439	armadillo repeat protein
cochr3.3	chr2	81.9	87.6	3259457	3981377	721920	jgi.p|Lenedo1|14913	3581896	3583545	predicted protein
cochr3.3	chr2	81.9	87.6	3259457	3981377	721920	jgi.p|Lenedo1|1157564	3583809	3588226	histone deacetylase complex, SIN3 component
cochr3.3	chr2	81.9	87.6	3259457	3981377	721920	jgi.p|Lenedo1|1076373	3589331	3589912	---NA---
cochr3.3	chr2	81.9	87.6	3259457	3981377	721920	jgi.p|Lenedo1|1032492	3590269	3591946	pali-domain-containing protein
cochr3.3	chr2	81.9	87.6	3259457	3981377	721920	jgi.p|Lenedo1|1031915	3592140	3593958	Arginase/deacetylase
cochr3.3	chr2	81.9	87.6	3259457	3981377	721920	jgi.p|Lenedo1|1064820	3594457	3595153	---NA---
cochr3.3	chr2	81.9	87.6	3259457	3981377	721920	jgi.p|Lenedo1|15109	3595073	3596086	predicted protein
cochr3.3	chr2	81.9	87.6	3259457	3981377	721920	jgi.p|Lenedo1|1164484	3596616	3597301	f1f0 atp synthase assembly protein atp10
cochr3.3	chr2	81.9	87.6	3259457	3981377	721920	jgi.p|Lenedo1|1076381	3597477	3598804	WD40 repeat-like protein
cochr3.3	chr2	81.9	87.6	3259457	3981377	721920	jgi.p|Lenedo1|1076385	3598798	3602156	AAA-domain-containing protein
cochr3.3	chr2	81.9	87.6	3259457	3981377	721920	jgi.p|Lenedo1|15195	3603216	3604314	ribosomal protein l30
cochr3.3	chr2	81.9	87.6	3259457	3981377	721920	jgi.p|Lenedo1|1032044	3604308	3605480	bax inhibitor family protein
cochr3.3	chr2	81.9	87.6	3259457	3981377	721920	jgi.p|Lenedo1|1032201	3605898	3610068	Dna2-domain-containing protein
cochr3.3	chr2	81.9	87.6	3259457	3981377	721920	jgi.p|Lenedo1|1076406	3610197	3612580	WD40 repeat-like protein
cochr3.3	chr2	81.9	87.6	3259457	3981377	721920	jgi.p|Lenedo1|1269682	3612581	3615485	WD40 repeat-like protein
cochr3.3	chr2	81.9	87.6	3259457	3981377	721920	jgi.p|Lenedo1|1138194	3615487	3616370	ribosomal protein 60S
cochr3.3	chr2	81.9	87.6	3259457	3981377	721920	jgi.p|Lenedo1|1076411	3616381	3618357	predicted protein
cochr3.3	chr2	81.9	87.6	3259457	3981377	721920	jgi.p|Lenedo1|1076413	3618342	3619120	hypothetical protein LENED_000144
cochr3.3	chr2	81.9	87.6	3259457	3981377	721920	jgi.p|Lenedo1|1076415	3619870	3622717	Sec1-like protein
cochr3.3	chr2	81.9	87.6	3259457	3981377	721920	jgi.p|Lenedo1|1164495	3623260	3625037	predicted protein
cochr3.3	chr2	81.9	87.6	3259457	3981377	721920	jgi.p|Lenedo1|1076420	3625017	3625755	predicted protein
cochr3.3	chr2	81.9	87.6	3259457	3981377	721920	jgi.p|Lenedo1|1076427	3627015	3629570	predicted protein
cochr3.3	chr2	81.9	87.6	3259457	3981377	721920	jgi.p|Lenedo1|995172	3630954	3631301	transcription factor
cochr3.3	chr2	81.9	87.6	3259457	3981377	721920	jgi.p|Lenedo1|1242407	3631636	3636319	predicted protein
cochr3.3	chr2	81.9	87.6	3259457	3981377	721920	jgi.p|Lenedo1|1076430	3636543	3637371	hypothetical protein Moror_4778
cochr3.3	chr2	81.9	87.6	3259457	3981377	721920	jgi.p|Lenedo1|1164499	3638401	3641619	sphingomyelin phosphodiesterase
cochr3.3	chr2	81.9	87.6	3259457	3981377	721920	jgi.p|Lenedo1|16185	3641684	3642607	hypothetical protein GYMLUDRAFT_32614, partial
cochr3.3	chr2	81.9	87.6	3259457	3981377	721920	jgi.p|Lenedo1|16520	3644537	3646351	ribonuclease T2
cochr3.3	chr2	81.9	87.6	3259457	3981377	721920	jgi.p|Lenedo1|1032203	3646627	3647340	diadenosine 5',5'''-P1,P4-tetraphosphate asymmetrical hydrolase
cochr3.3	chr2	81.9	87.6	3259457	3981377	721920	jgi.p|Lenedo1|1032022	3647517	3649218	salicylate hydroxylase
cochr3.3	chr2	81.9	87.6	3259457	3981377	721920	jgi.p|Lenedo1|1032546	3649345	3650064	predicted protein
cochr3.3	chr2	81.9	87.6	3259457	3981377	721920	jgi.p|Lenedo1|1157583	3650546	3651513	Diaminopimelate epimerase-like protein
cochr3.3	chr2	81.9	87.6	3259457	3981377	721920	jgi.p|Lenedo1|1157584	3651708	3653092	predicted protein
cochr3.3	chr2	81.9	87.6	3259457	3981377	721920	jgi.p|Lenedo1|16143	3652965	3655158	proline-rich family protein
cochr3.3	chr2	81.9	87.6	3259457	3981377	721920	jgi.p|Lenedo1|1012340	3655298	3657352	ring finger domain protein
cochr3.3	chr2	81.9	87.6	3259457	3981377	721920	jgi.p|Lenedo1|16165	3657961	3659089	proteophosphoglycan 5
cochr3.3	chr2	81.9	87.6	3259457	3981377	721920	jgi.p|Lenedo1|1032466	3659573	3660801	osmosensor protein
cochr3.3	chr2	81.9	87.6	3259457	3981377	721920	jgi.p|Lenedo1|1064843	3662722	3663580	acyl-CoA N-acyltransferase
cochr3.3	chr2	81.9	87.6	3259457	3981377	721920	jgi.p|Lenedo1|1157588	3663859	3666915	predicted protein
cochr3.3	chr2	81.9	87.6	3259457	3981377	721920	jgi.p|Lenedo1|1242443	3667158	3672089	RNA polymerase II subunit A C-terminal domain phosphatase
cochr3.3	chr2	81.9	87.6	3259457	3981377	721920	jgi.p|Lenedo1|1164515	3672261	3675283	predicted protein
cochr3.3	chr2	81.9	87.6	3259457	3981377	721920	jgi.p|Lenedo1|1064847	3675557	3676611	plant basic secretory protein
cochr3.3	chr2	81.9	87.6	3259457	3981377	721920	jgi.p|Lenedo1|1164517	3677766	3678598	hypothetical protein LENED_000306
cochr3.3	chr2	81.9	87.6	3259457	3981377	721920	jgi.p|Lenedo1|1032081	3678865	3679701	predicted protein
cochr3.3	chr2	81.9	87.6	3259457	3981377	721920	jgi.p|Lenedo1|1031445	3680383	3682353	MFS general substrate transporter
cochr3.3	chr2	81.9	87.6	3259457	3981377	721920	jgi.p|Lenedo1|1076561	3682932	3684692	predicted protein
cochr3.3	chr2	81.9	87.6	3259457	3981377	721920	jgi.p|Lenedo1|1064852	3686332	3688550	---NA---
cochr3.3	chr2	81.9	87.6	3259457	3981377	721920	jgi.p|Lenedo1|1031234	3688872	3689456	hypothetical protein GYMLUDRAFT_165086, partial
cochr3.3	chr2	81.9	87.6	3259457	3981377	721920	jgi.p|Lenedo1|1164523	3692045	3693453	hypothetical protein GYMLUDRAFT_144429, partial
cochr3.3	chr2	81.9	87.6	3259457	3981377	721920	jgi.p|Lenedo1|1064855	3695234	3695860	---NA---
cochr3.3	chr2	81.9	87.6	3259457	3981377	721920	jgi.p|Lenedo1|1164524	3696443	3698792	hypothetical protein GYMLUDRAFT_247885
cochr3.3	chr2	81.9	87.6	3259457	3981377	721920	jgi.p|Lenedo1|1164525	3699108	3699840	---NA---
cochr3.3	chr2	81.9	87.6	3259457	3981377	721920	jgi.p|Lenedo1|1164526	3699874	3701295	hypothetical protein GYMLUDRAFT_56824
cochr3.3	chr2	81.9	87.6	3259457	3981377	721920	jgi.p|Lenedo1|1064858	3702911	3704209	predicted protein
cochr3.3	chr2	81.9	87.6	3259457	3981377	721920	jgi.p|Lenedo1|1138251	3706220	3707747	predicted protein
cochr3.3	chr2	81.9	87.6	3259457	3981377	721920	jgi.p|Lenedo1|1076565	3707918	3709118	hypothetical protein LENED_007801
cochr3.3	chr2	81.9	87.6	3259457	3981377	721920	jgi.p|Lenedo1|1076568	3709200	3713990	dna repair protein rad5
cochr3.3	chr2	81.9	87.6	3259457	3981377	721920	jgi.p|Lenedo1|1031564	3714074	3716012	t-complex protein eta subunit (tcp-1-eta)
cochr3.3	chr2	81.9	87.6	3259457	3981377	721920	jgi.p|Lenedo1|17498	3716150	3719031	MFS general substrate transporter
cochr3.3	chr2	81.9	87.6	3259457	3981377	721920	jgi.p|Lenedo1|1164533	3719061	3720570	mucin-like protein
cochr3.3	chr2	81.9	87.6	3259457	3981377	721920	jgi.p|Lenedo1|1164534	3720680	3722145	Protein FAM86B1
cochr3.3	chr2	81.9	87.6	3259457	3981377	721920	jgi.p|Lenedo1|1031780	3722209	3723520	WLM-domain-containing protein
cochr3.3	chr2	81.9	87.6	3259457	3981377	721920	jgi.p|Lenedo1|1164536	3724141	3727307	Demethylmenaquinone methyltransferase
cochr3.3	chr2	81.9	87.6	3259457	3981377	721920	jgi.p|Lenedo1|17808	3727469	3728381	splicing factor 3B subunit 5
cochr3.3	chr2	81.9	87.6	3259457	3981377	721920	jgi.p|Lenedo1|1076590	3728412	3730359	Nuclear nucleic acid-binding protein C1D
cochr3.3	chr2	81.9	87.6	3259457	3981377	721920	jgi.p|Lenedo1|1164538	3730499	3731128	predicted protein
cochr3.3	chr2	81.9	87.6	3259457	3981377	721920	jgi.p|Lenedo1|17790	3731334	3734643	predicted protein
cochr3.3	chr2	81.9	87.6	3259457	3981377	721920	jgi.p|Lenedo1|1076596	3735467	3736432	antagonist of mitotic exit network protein 1
cochr3.3	chr2	81.9	87.6	3259457	3981377	721920	jgi.p|Lenedo1|1032302	3737009	3739667	Sec1-like protein
cochr3.3	chr2	81.9	87.6	3259457	3981377	721920	jgi.p|Lenedo1|1076599	3739581	3745592	patatin-domain-containing protein
cochr3.3	chr2	81.9	87.6	3259457	3981377	721920	jgi.p|Lenedo1|1164542	3745717	3746718	hypothetical protein GYMLUDRAFT_278437
cochr3.3	chr2	81.9	87.6	3259457	3981377	721920	jgi.p|Lenedo1|17876	3747682	3750897	predicted protein
cochr3.3	chr2	81.9	87.6	3259457	3981377	721920	jgi.p|Lenedo1|1031940	3751028	3753335	isocitrate lyase
cochr3.3	chr2	81.9	87.6	3259457	3981377	721920	jgi.p|Lenedo1|1032320	3753477	3755194	FAD/NAD(P)-binding domain-containing protein
cochr3.3	chr2	81.9	87.6	3259457	3981377	721920	jgi.p|Lenedo1|19096	3755133	3757277	hypothetical protein LENED_000328
cochr3.3	chr2	81.9	87.6	3259457	3981377	721920	jgi.p|Lenedo1|1157608	3757818	3759423	distal-less homeobox 3
cochr3.3	chr2	81.9	87.6	3259457	3981377	721920	jgi.p|Lenedo1|1076612	3759591	3762080	pantothenate kinase
cochr3.3	chr2	81.9	87.6	3259457	3981377	721920	jgi.p|Lenedo1|18202	3762600	3764400	hypothetical protein LENED_000331
cochr3.3	chr2	81.9	87.6	3259457	3981377	721920	jgi.p|Lenedo1|1164550	3764904	3766235	hypothetical protein LENED_000213
cochr3.3	chr2	81.9	87.6	3259457	3981377	721920	jgi.p|Lenedo1|18618	3767246	3772190	predicted protein
cochr3.3	chr2	81.9	87.6	3259457	3981377	721920	jgi.p|Lenedo1|1031833	3772583	3775950	glycosyltransferase family 2 protein
cochr3.3	chr2	81.9	87.6	3259457	3981377	721920	jgi.p|Lenedo1|1032047	3777703	3778815	kinase-like protein
cochr3.3	chr2	81.9	87.6	3259457	3981377	721920	jgi.p|Lenedo1|19939	3779721	3783485	coatomer subunit gamma
cochr3.3	chr2	81.9	87.6	3259457	3981377	721920	jgi.p|Lenedo1|1157614	3783538	3784730	predicted protein
cochr3.3	chr2	81.9	87.6	3259457	3981377	721920	jgi.p|Lenedo1|20378	3784415	3786176	hypothetical protein LENED_008491
cochr3.3	chr2	81.9	87.6	3259457	3981377	721920	jgi.p|Lenedo1|20125	3786131	3787780	origin recognition complex subunit 2
cochr3.3	chr2	81.9	87.6	3259457	3981377	721920	jgi.p|Lenedo1|1164558	3787917	3788832	predicted protein
cochr3.3	chr2	81.9	87.6	3259457	3981377	721920	jgi.p|Lenedo1|1064878	3789215	3790124	hypothetical protein LENED_008494
cochr3.3	chr2	81.9	87.6	3259457	3981377	721920	jgi.p|Lenedo1|1164560	3791755	3795255	Het-C-domain-containing protein
cochr3.3	chr2	81.9	87.6	3259457	3981377	721920	jgi.p|Lenedo1|20112	3795352	3796212	predicted protein
cochr3.3	chr2	81.9	87.6	3259457	3981377	721920	jgi.p|Lenedo1|1164562	3796759	3797895	DASH complex subunit DAM1
cochr3.3	chr2	81.9	87.6	3259457	3981377	721920	jgi.p|Lenedo1|1076694	3798064	3800886	predicted protein
cochr3.3	chr2	81.9	87.6	3259457	3981377	721920	jgi.p|Lenedo1|1076699	3800887	3801673	tubulin binding cofactor A
cochr3.3	chr2	81.9	87.6	3259457	3981377	721920	jgi.p|Lenedo1|21184	3802764	3804406	predicted protein
cochr3.3	chr2	81.9	87.6	3259457	3981377	721920	jgi.p|Lenedo1|1032120	3807762	3808918	hypothetical protein LENED_008501
cochr3.3	chr2	81.9	87.6	3259457	3981377	721920	jgi.p|Lenedo1|1164565	3810233	3811292	predicted protein
cochr3.3	chr2	81.9	87.6	3259457	3981377	721920	jgi.p|Lenedo1|1076728	3814799	3818004	methionyl-tRNA synthetase
cochr3.3	chr2	81.9	87.6	3259457	3981377	721920	jgi.p|Lenedo1|1076730	3818919	3821246	Protein LTV1
cochr3.3	chr2	81.9	87.6	3259457	3981377	721920	jgi.p|Lenedo1|1164568	3821443	3827933	tata-binding protein associated factor taf2
cochr3.3	chr2	81.9	87.6	3259457	3981377	721920	jgi.p|Lenedo1|1242512	3828504	3836226	1-phosphatidylinositol-3-phosphate 5-kinase
cochr3.3	chr2	81.9	87.6	3259457	3981377	721920	jgi.p|Lenedo1|20718	3836233	3840206	endoplasmic reticulum protein
cochr3.3	chr2	81.9	87.6	3259457	3981377	721920	jgi.p|Lenedo1|20700	3840080	3841307	hypothetical protein GYMLUDRAFT_32528
cochr3.3	chr2	81.9	87.6	3259457	3981377	721920	jgi.p|Lenedo1|21612	3841569	3844179	predicted protein
cochr3.3	chr2	81.9	87.6	3259457	3981377	721920	jgi.p|Lenedo1|1261674	3844260	3846650	terpenoid synthase
cochr3.3	chr2	81.9	87.6	3259457	3981377	721920	jgi.p|Lenedo1|1076755	3846651	3848963	PCI-domain-containing protein
cochr3.3	chr2	81.9	87.6	3259457	3981377	721920	jgi.p|Lenedo1|21713	3849193	3851914	TPR-like protein
cochr3.3	chr2	81.9	87.6	3259457	3981377	721920	jgi.p|Lenedo1|21771	3851620	3854619	Laminin-like protein epi-1
cochr3.3	chr2	81.9	87.6	3259457	3981377	721920	jgi.p|Lenedo1|1076784	3854708	3858591	Laminin-like protein epi-1
cochr3.3	chr2	81.9	87.6	3259457	3981377	721920	jgi.p|Lenedo1|1157624	3859597	3861803	Laminin-like protein epi-1
cochr3.3	chr2	81.9	87.6	3259457	3981377	721920	jgi.p|Lenedo1|21854	3861742	3863172	Laminin-like protein epi-1
cochr3.3	chr2	81.9	87.6	3259457	3981377	721920	jgi.p|Lenedo1|1242521	3863160	3865088	guanine nucleotide binding protein beta subunit 2
cochr3.3	chr2	81.9	87.6	3259457	3981377	721920	jgi.p|Lenedo1|1076818	3868311	3869205	predicted protein
cochr3.3	chr2	81.9	87.6	3259457	3981377	721920	jgi.p|Lenedo1|1138324	3869299	3871728	spindle pole body protein
cochr3.3	chr2	81.9	87.6	3259457	3981377	721920	jgi.p|Lenedo1|1076830	3871749	3874337	Rsm22-domain-containing protein
cochr3.3	chr2	81.9	87.6	3259457	3981377	721920	jgi.p|Lenedo1|1076833	3873576	3875128	50s ribosomal protein l1
cochr3.3	chr2	81.9	87.6	3259457	3981377	721920	jgi.p|Lenedo1|1076834	3875154	3881559	Nucleoporin nup184
cochr3.3	chr2	81.9	87.6	3259457	3981377	721920	jgi.p|Lenedo1|1031946	3881549	3882112	54S ribosomal protein L28, mitochondrial
cochr3.3	chr2	81.9	87.6	3259457	3981377	721920	jgi.p|Lenedo1|22447	3882291	3885392	rna recognition motif domain containing protein
cochr3.3	chr2	81.9	87.6	3259457	3981377	721920	jgi.p|Lenedo1|1076840	3885443	3886687	GTP-binding protein RAB5
cochr3.3	chr2	81.9	87.6	3259457	3981377	721920	jgi.p|Lenedo1|1242540	3886688	3889555	ras GEF
cochr3.3	chr2	81.9	87.6	3259457	3981377	721920	jgi.p|Lenedo1|1076843	3889639	3891251	DUF292-domain-containing protein
cochr3.3	chr2	81.9	87.6	3259457	3981377	721920	jgi.p|Lenedo1|1076885	3893943	3895749	S-adenosyl-L-methionine-dependent methyltransferase
cochr3.3	chr2	81.9	87.6	3259457	3981377	721920	jgi.p|Lenedo1|1076890	3895750	3900828	antiviral helicase
cochr3.3	chr2	81.9	87.6	3259457	3981377	721920	jgi.p|Lenedo1|1076894	3900829	3902542	hypothetical protein GYMLUDRAFT_65705
cochr3.3	chr2	81.9	87.6	3259457	3981377	721920	jgi.p|Lenedo1|23510	3903352	3904453	predicted protein
cochr3.3	chr2	81.9	87.6	3259457	3981377	721920	jgi.p|Lenedo1|23757	3904609	3905864	---NA---
cochr3.3	chr2	81.9	87.6	3259457	3981377	721920	jgi.p|Lenedo1|1164593	3905935	3907394	predicted protein
cochr3.3	chr2	81.9	87.6	3259457	3981377	721920	jgi.p|Lenedo1|23390	3907449	3909424	predicted protein
cochr3.3	chr2	81.9	87.6	3259457	3981377	721920	jgi.p|Lenedo1|1076910	3909653	3912079	glycosyltransferase family 15 protein
cochr3.3	chr2	81.9	87.6	3259457	3981377	721920	jgi.p|Lenedo1|1076912	3912537	3914797	predicted protein
cochr3.3	chr2	81.9	87.6	3259457	3981377	721920	jgi.p|Lenedo1|1076919	3914799	3915886	prefoldin subunit
cochr3.3	chr2	81.9	87.6	3259457	3981377	721920	jgi.p|Lenedo1|1031714	3916078	3919787	Calreticulin-domain-containing protein
cochr3.3	chr2	81.9	87.6	3259457	3981377	721920	jgi.p|Lenedo1|1157640	3919923	3921681	Monooxygenase, FAD-binding
cochr3.3	chr2	81.9	87.6	3259457	3981377	721920	jgi.p|Lenedo1|23802	3921821	3922638	predicted protein
cochr3.3	chr2	81.9	87.6	3259457	3981377	721920	jgi.p|Lenedo1|24029	3924355	3925825	TKL TKL-ccinproteinkinase
cochr3.3	chr2	81.9	87.6	3259457	3981377	721920	jgi.p|Lenedo1|24082	3925428	3926293	monocarboxylate permease-like protein
cochr3.3	chr2	81.9	87.6	3259457	3981377	721920	jgi.p|Lenedo1|24178	3926892	3927685	hypothetical protein LENED_008541
cochr3.3	chr2	81.9	87.6	3259457	3981377	721920	jgi.p|Lenedo1|1076940	3927497	3928167	---NA---
cochr3.3	chr2	81.9	87.6	3259457	3981377	721920	jgi.p|Lenedo1|1032135	3927976	3930041	Calreticulin-domain-containing protein
cochr3.3	chr2	81.9	87.6	3259457	3981377	721920	jgi.p|Lenedo1|24221	3931727	3933654	heterotrimeric G-protein alpha subunit, GPA3-like protein
cochr3.3	chr2	81.9	87.6	3259457	3981377	721920	jgi.p|Lenedo1|24644	3935153	3940255	dna cytosine-5 methyltransferase
cochr3.3	chr2	81.9	87.6	3259457	3981377	721920	jgi.p|Lenedo1|24582	3939904	3941732	GroES-like protein
cochr3.3	chr2	81.9	87.6	3259457	3981377	721920	jgi.p|Lenedo1|1157644	3941856	3943262	HCP-like protein
cochr3.3	chr2	81.9	87.6	3259457	3981377	721920	jgi.p|Lenedo1|1157645	3943960	3944769	flavo protein
cochr3.3	chr2	81.9	87.6	3259457	3981377	721920	jgi.p|Lenedo1|1064921	3945396	3948548	K+ H+ antiporter
cochr3.3	chr2	81.9	87.6	3259457	3981377	721920	jgi.p|Lenedo1|1076963	3949442	3950458	50S ribosomal protein L10
cochr3.3	chr2	81.9	87.6	3259457	3981377	721920	jgi.p|Lenedo1|1032147	3950551	3952312	squalene epoxidase
cochr3.3	chr2	81.9	87.6	3259457	3981377	721920	jgi.p|Lenedo1|1076968	3952562	3955000	Fip1-domain-containing protein
cochr3.3	chr2	81.9	87.6	3259457	3981377	721920	jgi.p|Lenedo1|1076980	3955908	3956867	cytidine deaminase
cochr3.3	chr2	81.9	87.6	3259457	3981377	721920	jgi.p|Lenedo1|1076982	3956868	3958624	ing1 protein
cochr3.3	chr2	81.9	87.6	3259457	3981377	721920	jgi.p|Lenedo1|1064926	3959237	3961703	hypothetical protein LENED_008555
cochr3.3	chr2	81.9	87.6	3259457	3981377	721920	jgi.p|Lenedo1|1064927	3963435	3965482	other/FunK1 protein kinase
cochr3.3	chr2	81.9	87.6	3259457	3981377	721920	jgi.p|Lenedo1|1032506	3969271	3970751	predicted protein
cochr3.3	chr2	81.9	87.6	3259457	3981377	721920	jgi.p|Lenedo1|25543	3971145	3974165	nuclear mrna splicing protein
cochr3.3	chr2	81.9	87.6	3259457	3981377	721920	jgi.p|Lenedo1|1233215	3974299	3975769	hypothetical protein LENED_012002
cochr3.3	chr2	81.9	87.6	3259457	3981377	721920	jgi.p|Lenedo1|1031805	3975902	3976360	DnaJ-domain-containing protein
cochr3.3	chr2	81.9	87.6	3259457	3981377	721920	jgi.p|Lenedo1|1180157	3979071	3981744	FAD/NAD-binding domain-containing protein
cochr4.1	chr4	44.5	45.1	1587906	1984278	396372	jgi.p|Lenedo1|1168478	1687433	1689127	MFS general substrate transporter
cochr4.1	chr4	44.5	45.1	1587906	1984278	396372	jgi.p|Lenedo1|1168479	1690544	1693084	glycosyltransferase family 90 protein
cochr4.1	chr4	44.5	45.1	1587906	1984278	396372	jgi.p|Lenedo1|1168480	1693379	1695976	glycosyltransferase family 90 protein
cochr4.1	chr4	44.5	45.1	1587906	1984278	396372	jgi.p|Lenedo1|1095044	1697038	1698859	hypothetical protein LENED_007487
cochr4.1	chr4	44.5	45.1	1587906	1984278	396372	jgi.p|Lenedo1|1095048	1698762	1701311	predicted protein
cochr4.1	chr4	44.5	45.1	1587906	1984278	396372	jgi.p|Lenedo1|915066	1702015	1704011	hypothetical protein LENED_001461
cochr4.1	chr4	44.5	45.1	1587906	1984278	396372	jgi.p|Lenedo1|1159703	1704193	1705112	hypothetical protein LENED_001473
cochr4.1	chr4	44.5	45.1	1587906	1984278	396372	jgi.p|Lenedo1|1067904	1706442	1708040	hypothetical protein LENED_008756
cochr4.1	chr4	44.5	45.1	1587906	1984278	396372	jgi.p|Lenedo1|915082	1710059	1712138	hypothetical protein LENED_001467
cochr4.1	chr4	44.5	45.1	1587906	1984278	396372	jgi.p|Lenedo1|1168487	1712175	1713520	gpi-anchor transamidase
cochr4.1	chr4	44.5	45.1	1587906	1984278	396372	jgi.p|Lenedo1|1067908	1715014	1716379	GroES-like protein
cochr4.1	chr4	44.5	45.1	1587906	1984278	396372	jgi.p|Lenedo1|915224	1718708	1720659	hypothetical protein LENED_001461
cochr4.1	chr4	44.5	45.1	1587906	1984278	396372	jgi.p|Lenedo1|1039712	1723613	1725136	Pkinase-domain-containing protein
cochr4.1	chr4	44.5	45.1	1587906	1984278	396372	jgi.p|Lenedo1|733590	1631469	1633387	hypothetical protein GYMLUDRAFT_719545
cochr4.1	chr4	44.5	45.1	1587906	1984278	396372	jgi.p|Lenedo1|1259280	1630831	1631450	predicted protein
cochr4.1	chr4	44.5	45.1	1587906	1984278	396372	jgi.p|Lenedo1|1130367	1627685	1629543	hypothetical protein PILCRDRAFT_93785
cochr4.1	chr4	44.5	45.1	1587906	1984278	396372	jgi.p|Lenedo1|1059353	1625562	1627526	predicted protein
cochr4.1	chr4	44.5	45.1	1587906	1984278	396372	jgi.p|Lenedo1|1268589	1619691	1621589	hypothetical protein LENED_001070
cochr4.1	chr4	44.5	45.1	1587906	1984278	396372	jgi.p|Lenedo1|1268590	1617880	1619445	---NA---
cochr4.1	chr4	44.5	45.1	1587906	1984278	396372	jgi.p|Lenedo1|1059302	1616111	1616989	predicted protein
cochr4.1	chr4	44.5	45.1	1587906	1984278	396372	jgi.p|Lenedo1|1059285	1613905	1615727	CAP64-like protein
cochr4.1	chr4	44.5	45.1	1587906	1984278	396372	jgi.p|Lenedo1|1130383	1612640	1613761	predicted protein
cochr4.1	chr4	44.5	45.1	1587906	1984278	396372	jgi.p|Lenedo1|1130386	1610281	1612473	glycosyltransferase family 69 protein
cochr4.1	chr4	44.5	45.1	1587906	1984278	396372	jgi.p|Lenedo1|1130391	1606977	1609098	amidohydrolase
cochr4.1	chr4	44.5	45.1	1587906	1984278	396372	jgi.p|Lenedo1|1130397	1605427	1606976	oxidoreductase
cochr4.1	chr4	44.5	45.1	1587906	1984278	396372	jgi.p|Lenedo1|733910	1603054	1605400	cop9 signalosome complex subunit 1
cochr4.1	chr4	44.5	45.1	1587906	1984278	396372	jgi.p|Lenedo1|1130408	1600646	1602902	cop9 signalosome complex subunit 1
cochr4.1	chr4	44.5	45.1	1587906	1984278	396372	jgi.p|Lenedo1|733968	1599492	1600655	heme peroxidase
cochr4.1	chr4	44.5	45.1	1587906	1984278	396372	jgi.p|Lenedo1|1130410	1596641	1599461	heme peroxidase
cochr4.1	chr4	44.5	45.1	1587906	1984278	396372	jgi.p|Lenedo1|1176631	1595092	1596590	zz-type zinc finger-containing protein 3-like
cochr4.1	chr4	44.5	45.1	1587906	1984278	396372	jgi.p|Lenedo1|733904	1593501	1594761	DUF757-domain-containing protein
cochr4.1	chr4	44.5	45.1	1587906	1984278	396372	jgi.p|Lenedo1|1074397	1726984	1727943	CIC11C00000000234 [
cochr4.1	chr4	44.5	45.1	1587906	1984278	396372	jgi.p|Lenedo1|794508	1731689	1733978	---NA---
cochr4.1	chr4	44.5	45.1	1587906	1984278	396372	jgi.p|Lenedo1|794357	1734872	1736099	---NA---
cochr4.1	chr4	44.5	45.1	1587906	1984278	396372	jgi.p|Lenedo1|794396	1736554	1737481	hypothetical protein LENED_005723
cochr4.1	chr4	44.5	45.1	1587906	1984278	396372	jgi.p|Lenedo1|1177203	1738767	1739744	predicted protein
cochr4.1	chr4	44.5	45.1	1587906	1984278	396372	jgi.p|Lenedo1|1177204	1740292	1741729	alpha/beta-hydrolase
cochr4.1	chr4	44.5	45.1	1587906	1984278	396372	jgi.p|Lenedo1|794803	1741998	1742993	hypothetical protein LENED_005719
cochr4.1	chr4	44.5	45.1	1587906	1984278	396372	jgi.p|Lenedo1|1060647	1744311	1747621	glycoside hydrolase family 31 protein
cochr4.1	chr4	44.5	45.1	1587906	1984278	396372	jgi.p|Lenedo1|794655	1748873	1751215	predicted protein
cochr4.1	chr4	44.5	45.1	1587906	1984278	396372	jgi.p|Lenedo1|1241327	1751264	1752606	predicted protein
cochr4.1	chr4	44.5	45.1	1587906	1984278	396372	jgi.p|Lenedo1|794956	1757233	1758972	protein serine/threonine phosphatase 2C
cochr4.1	chr4	44.5	45.1	1587906	1984278	396372	jgi.p|Lenedo1|1177211	1759340	1762314	MFS general substrate transporter
cochr4.1	chr4	44.5	45.1	1587906	1984278	396372	jgi.p|Lenedo1|795327	1764525	1765653	hypothetical protein LENED_005710
cochr4.1	chr4	44.5	45.1	1587906	1984278	396372	jgi.p|Lenedo1|1074411	1766277	1768269	predicted protein
cochr4.1	chr4	44.5	45.1	1587906	1984278	396372	jgi.p|Lenedo1|1132690	1768303	1769598	predicted protein
cochr4.1	chr4	44.5	45.1	1587906	1984278	396372	jgi.p|Lenedo1|1074413	1788244	1789012	---NA---
cochr4.1	chr4	44.5	45.1	1587906	1984278	396372	jgi.p|Lenedo1|1074414	1789300	1790331	hypothetical protein LENED_010272
cochr4.1	chr4	44.5	45.1	1587906	1984278	396372	jgi.p|Lenedo1|1060595	1791314	1791535	predicted protein
cochr4.1	chr4	44.5	45.1	1587906	1984278	396372	jgi.p|Lenedo1|1074415	1792245	1793083	hypothetical protein LENED_009388
cochr4.1	chr4	44.5	45.1	1587906	1984278	396372	jgi.p|Lenedo1|1155932	1793898	1796062	pre-mrna splicing factor
cochr4.1	chr4	44.5	45.1	1587906	1984278	396372	jgi.p|Lenedo1|1220178	1796145	1797390	phospholipase carboxylesterase
cochr4.1	chr4	44.5	45.1	1587906	1984278	396372	jgi.p|Lenedo1|1060708	1797601	1800561	predicted protein
cochr4.1	chr4	44.5	45.1	1587906	1984278	396372	jgi.p|Lenedo1|795619	1800749	1803402	glycoside hydrolase family 16 protein
cochr4.1	chr4	44.5	45.1	1587906	1984278	396372	jgi.p|Lenedo1|1060684	1804411	1807063	glycoside hydrolase family 47 protein
cochr4.1	chr4	44.5	45.1	1587906	1984278	396372	jgi.p|Lenedo1|1060594	1807141	1809004	MFS general substrate transporter
cochr4.1	chr4	44.5	45.1	1587906	1984278	396372	jgi.p|Lenedo1|1177228	1809177	1810907	hypothetical protein GYMLUDRAFT_54114
cochr4.1	chr4	44.5	45.1	1587906	1984278	396372	jgi.p|Lenedo1|1074420	1812995	1813976	hypothetical protein LENED_009243
cochr4.1	chr4	44.5	45.1	1587906	1984278	396372	jgi.p|Lenedo1|796634	1815611	1816181	BNR/Asp-box repeat protein
cochr4.1	chr4	44.5	45.1	1587906	1984278	396372	jgi.p|Lenedo1|1074421	1816281	1818383	predicted protein
cochr4.1	chr4	44.5	45.1	1587906	1984278	396372	jgi.p|Lenedo1|796475	1818508	1820229	DNA repair protein RAD51 3
cochr4.1	chr4	44.5	45.1	1587906	1984278	396372	jgi.p|Lenedo1|796537	1820097	1821789	alpha beta hydrolase fold protein
cochr4.1	chr4	44.5	45.1	1587906	1984278	396372	jgi.p|Lenedo1|1060635	1821875	1822620	5-formyltetrahydrofolate cyclo-ligase
cochr4.1	chr4	44.5	45.1	1587906	1984278	396372	jgi.p|Lenedo1|1060743	1823079	1824047	c2h2 conidiation transcription factor
cochr4.1	chr4	44.5	45.1	1587906	1984278	396372	jgi.p|Lenedo1|1060590	1827122	1828183	PIN domain-like protein
cochr4.1	chr4	44.5	45.1	1587906	1984278	396372	jgi.p|Lenedo1|796235	1828532	1831005	predicted protein
cochr4.1	chr4	44.5	45.1	1587906	1984278	396372	jgi.p|Lenedo1|1074425	1830942	1832017	hypothetical protein LENED_011032
cochr4.1	chr4	44.5	45.1	1587906	1984278	396372	jgi.p|Lenedo1|796977	1833276	1834984	predicted protein
cochr4.1	chr4	44.5	45.1	1587906	1984278	396372	jgi.p|Lenedo1|1060615	1835821	1837106	Sec20-domain-containing protein
cochr4.1	chr4	44.5	45.1	1587906	1984278	396372	jgi.p|Lenedo1|1060736	1837361	1839946	predicted protein
cochr4.1	chr4	44.5	45.1	1587906	1984278	396372	jgi.p|Lenedo1|797027	1840184	1844754	glycosyltransferase family 20 protein
cochr4.1	chr4	44.5	45.1	1587906	1984278	396372	jgi.p|Lenedo1|1177242	1844915	1846308	hypothetical protein LENED_011040
cochr4.1	chr4	44.5	45.1	1587906	1984278	396372	jgi.p|Lenedo1|796986	1846286	1847955	para-aminobenzoic acid synthetase
cochr4.1	chr4	44.5	45.1	1587906	1984278	396372	jgi.p|Lenedo1|1177244	1849305	1854903	6-methylsalicylic acid synthase
cochr4.1	chr4	44.5	45.1	1587906	1984278	396372	jgi.p|Lenedo1|1060607	1857928	1859586	regulatory P domain-containing protein
cochr4.1	chr4	44.5	45.1	1587906	1984278	396372	jgi.p|Lenedo1|1132775	1859496	1867419	unc-80-like protein
cochr4.1	chr4	44.5	45.1	1587906	1984278	396372	jgi.p|Lenedo1|1132791	1867420	1872911	coiled-coil protein
cochr4.1	chr4	44.5	45.1	1587906	1984278	396372	jgi.p|Lenedo1|1132795	1873592	1876633	predicted protein
cochr4.1	chr4	44.5	45.1	1587906	1984278	396372	jgi.p|Lenedo1|1260031	1879736	1880670	predicted protein
cochr4.1	chr4	44.5	45.1	1587906	1984278	396372	jgi.p|Lenedo1|1177249	1880749	1882187	NAD-binding protein
cochr4.1	chr4	44.5	45.1	1587906	1984278	396372	jgi.p|Lenedo1|1177250	1883405	1886203	high-affinity phosphodiesterase
cochr4.1	chr4	44.5	45.1	1587906	1984278	396372	jgi.p|Lenedo1|1060729	1888632	1889762	hypothetical protein PAXRUDRAFT_172141
cochr4.1	chr4	44.5	45.1	1587906	1984278	396372	jgi.p|Lenedo1|1024714	1889902	1890204	hypothetical protein PAXINDRAFT_26351, partial
cochr4.1	chr4	44.5	45.1	1587906	1984278	396372	jgi.p|Lenedo1|1177254	1903776	1907132	sec24-like protein
cochr4.1	chr4	44.5	45.1	1587906	1984278	396372	jgi.p|Lenedo1|1163786	1907247	1909243	histidyl-tRNA synthetase
cochr4.1	chr4	44.5	45.1	1587906	1984278	396372	jgi.p|Lenedo1|798013	1909696	1910676	exosome complex exonuclease rrp40
cochr4.1	chr4	44.5	45.1	1587906	1984278	396372	jgi.p|Lenedo1|1060621	1911271	1911822	predicted protein
cochr4.1	chr4	44.5	45.1	1587906	1984278	396372	jgi.p|Lenedo1|798296	1911822	1912403	---NA---
cochr4.1	chr4	44.5	45.1	1587906	1984278	396372	jgi.p|Lenedo1|1074441	1912634	1915008	hypothetical protein LENED_011057
cochr4.1	chr4	44.5	45.1	1587906	1984278	396372	jgi.p|Lenedo1|1177259	1915578	1916172	predicted protein
cochr4.1	chr4	44.5	45.1	1587906	1984278	396372	jgi.p|Lenedo1|1132860	1917913	1918779	hypothetical protein LENED_011022
cochr4.1	chr4	44.5	45.1	1587906	1984278	396372	jgi.p|Lenedo1|1132862	1918817	1919787	RBP11-like subunits of RNA polymerase
cochr4.1	chr4	44.5	45.1	1587906	1984278	396372	jgi.p|Lenedo1|1177261	1920293	1922501	glycoside hydrolase family 5 protein
cochr4.1	chr4	44.5	45.1	1587906	1984278	396372	jgi.p|Lenedo1|1132875	1923154	1925646	predicted protein
cochr4.1	chr4	44.5	45.1	1587906	1984278	396372	jgi.p|Lenedo1|1132880	1925647	1927784	hypothetical protein LENED_001453
cochr4.1	chr4	44.5	45.1	1587906	1984278	396372	jgi.p|Lenedo1|1132889	1929116	1932125	general transcriptional repressor
cochr4.1	chr4	44.5	45.1	1587906	1984278	396372	jgi.p|Lenedo1|1132898	1944608	1946218	acyl-CoA dehydrogenase NM domain-like protein
cochr4.1	chr4	44.5	45.1	1587906	1984278	396372	jgi.p|Lenedo1|994253	1947948	1948993	hypothetical protein GYMLUDRAFT_165532
cochr4.1	chr4	44.5	45.1	1587906	1984278	396372	jgi.p|Lenedo1|1074448	1951344	1951938	hypothetical protein GYMLUDRAFT_235113
cochr4.1	chr4	44.5	45.1	1587906	1984278	396372	jgi.p|Lenedo1|1074449	1952656	1954578	glycoside hydrolase family 63 protein
cochr4.1	chr4	44.5	45.1	1587906	1984278	396372	jgi.p|Lenedo1|998703	1954722	1955447	predicted protein
cochr4.1	chr4	44.5	45.1	1587906	1984278	396372	jgi.p|Lenedo1|1074450	1955506	1959702	predicted protein
cochr4.1	chr4	44.5	45.1	1587906	1984278	396372	jgi.p|Lenedo1|1220383	1960195	1963074	P-loop containing nucleoside triphosphate hydrolase protein
cochr4.1	chr4	44.5	45.1	1587906	1984278	396372	jgi.p|Lenedo1|798668	1963305	1963762	phd finger transcription
cochr4.1	chr4	44.5	45.1	1587906	1984278	396372	jgi.p|Lenedo1|1177274	1966322	1970833	ERAD-associated E3 ubiquitin-protein ligase doa10
cochr4.1	chr4	44.5	45.1	1587906	1984278	396372	jgi.p|Lenedo1|1177275	1971035	1971915	predicted protein
cochr4.1	chr4	44.5	45.1	1587906	1984278	396372	jgi.p|Lenedo1|798701	1973262	1974385	hypothetical protein GYMLUDRAFT_251375
cochr4.1	chr4	44.5	45.1	1587906	1984278	396372	jgi.p|Lenedo1|1132908	1974926	1976250	kinesin
cochr4.1	chr4	44.5	45.1	1587906	1984278	396372	jgi.p|Lenedo1|1060739	1977138	1979113	predicted protein
cochr4.1	chr4	44.5	45.1	1587906	1984278	396372	jgi.p|Lenedo1|1260068	1979716	1980590	hypothetical protein GYMLUDRAFT_112745, partial
cochr4.1	chr4	44.5	45.1	1587906	1984278	396372	jgi.p|Lenedo1|1220402	1982336	1983762	Pkinase-domain-containing protein
cochr4.1	chr4	44.5	45.1	1587906	1984278	396372	jgi.p|Lenedo1|1177280	1984270	1985252	NAD-P-binding protein
cochr4.2	chr4	55	58	3186447	3192631	6184	jgi.p|Lenedo1|1167171	3185646	3186668	predicted protein
cochr4.2	chr4	55	58	3186447	3192631	6184	jgi.p|Lenedo1|764109	3186991	3188642	FAD/NAD(P)-binding domain-containing protein
cochr4.2	chr4	55	58	3186447	3192631	6184	jgi.p|Lenedo1|1167173	3188774	3194028	wd repeat protein
cochr6.1	chr6	9.9	14.4	211605	235111	23506	jgi.p|Lenedo1|608069	210911	211755	---NA---
cochr6.1	chr6	9.9	14.4	211605	235111	23506	jgi.p|Lenedo1|1072817	214066	215027	hypothetical protein LENED_004653
cochr6.1	chr6	9.9	14.4	211605	235111	23506	jgi.p|Lenedo1|608307	217914	218836	hypothetical protein LENED_000010
cochr6.1	chr6	9.9	14.4	211605	235111	23506	jgi.p|Lenedo1|608941	232018	234640	cytochrome P450
cochr7.1	chr7	1.6	4.1	85139	921608	836469	jgi.p|Lenedo1|1173984	714072	715388	predicted protein
cochr7.1	chr7	1.6	4.1	85139	921608	836469	jgi.p|Lenedo1|1118954	716828	718038	hypothetical protein LENED_001815
cochr7.1	chr7	1.6	4.1	85139	921608	836469	jgi.p|Lenedo1|511938	719052	720056	hypothetical protein LENED_011108
cochr7.1	chr7	1.6	4.1	85139	921608	836469	jgi.p|Lenedo1|1072010	721145	725450	copper radical oxidase
cochr7.1	chr7	1.6	4.1	85139	921608	836469	jgi.p|Lenedo1|1119008	725725	727821	hypothetical protein LENED_011110
cochr7.1	chr7	1.6	4.1	85139	921608	836469	jgi.p|Lenedo1|512017	728101	730427	predicted protein
cochr7.1	chr7	1.6	4.1	85139	921608	836469	jgi.p|Lenedo1|1205252	730484	732703	putative Nucleoprotein TPR
cochr7.1	chr7	1.6	4.1	85139	921608	836469	jgi.p|Lenedo1|512068	733462	734167	SH3 domain-containing protein
cochr7.1	chr7	1.6	4.1	85139	921608	836469	jgi.p|Lenedo1|512092	735256	736976	SH3 domain-containing protein
cochr7.1	chr7	1.6	4.1	85139	921608	836469	jgi.p|Lenedo1|512389	737843	738910	hypothetical protein LENED_002894
cochr7.1	chr7	1.6	4.1	85139	921608	836469	jgi.p|Lenedo1|1053481	742531	744238	Transcriptional activator protein acu-15
cochr7.1	chr7	1.6	4.1	85139	921608	836469	jgi.p|Lenedo1|512156	744070	745394	Transcriptional activator protein acu-15
cochr7.1	chr7	1.6	4.1	85139	921608	836469	jgi.p|Lenedo1|512157	745395	746642	---NA---
cochr7.1	chr7	1.6	4.1	85139	921608	836469	jgi.p|Lenedo1|1072017	752416	752866	hypothetical protein LENED_009905
cochr7.1	chr7	1.6	4.1	85139	921608	836469	jgi.p|Lenedo1|1173993	754960	755607	hypothetical protein LENED_005103
cochr7.1	chr7	1.6	4.1	85139	921608	836469	jgi.p|Lenedo1|1072019	757195	758383	predicted protein
cochr7.1	chr7	1.6	4.1	85139	921608	836469	jgi.p|Lenedo1|1072020	759259	762352	hypothetical protein LENED_010158
cochr7.1	chr7	1.6	4.1	85139	921608	836469	jgi.p|Lenedo1|1053446	764555	765400	hypothetical protein GYMLUDRAFT_58392
cochr7.1	chr7	1.6	4.1	85139	921608	836469	jgi.p|Lenedo1|1053402	765397	766089	hypothetical protein PILCRDRAFT_10285
cochr7.1	chr7	1.6	4.1	85139	921608	836469	jgi.p|Lenedo1|1053374	766966	768009	hypothetical protein GYMLUDRAFT_64822
cochr7.1	chr7	1.6	4.1	85139	921608	836469	jgi.p|Lenedo1|997658	768599	769786	predicted protein
cochr7.1	chr7	1.6	4.1	85139	921608	836469	jgi.p|Lenedo1|1267089	777887	780051	hypothetical protein LENED_011110
cochr7.1	chr7	1.6	4.1	85139	921608	836469	jgi.p|Lenedo1|512579	780641	783674	predicted protein
cochr7.1	chr7	1.6	4.1	85139	921608	836469	jgi.p|Lenedo1|1174000	786331	786772	hypothetical protein LENED_008330
cochr7.1	chr7	1.6	4.1	85139	921608	836469	jgi.p|Lenedo1|1174001	789228	789639	hypothetical protein LENED_008329
cochr7.1	chr7	1.6	4.1	85139	921608	836469	jgi.p|Lenedo1|1072025	790856	791515	hypothetical protein LENED_008328
cochr7.1	chr7	1.6	4.1	85139	921608	836469	jgi.p|Lenedo1|1072026	792679	794140	Aldo/keto reductase
cochr7.1	chr7	1.6	4.1	85139	921608	836469	jgi.p|Lenedo1|1162324	794393	796474	glycoside hydrolase family 5 protein
cochr7.1	chr7	1.6	4.1	85139	921608	836469	jgi.p|Lenedo1|1119093	796887	800340	general vesicular transport factor p115
cochr7.1	chr7	1.6	4.1	85139	921608	836469	jgi.p|Lenedo1|1072029	801118	802281	hypothetical protein LENED_008323
cochr7.1	chr7	1.6	4.1	85139	921608	836469	jgi.p|Lenedo1|1267098	802841	804585	hypothetical protein LENED_008322
cochr7.1	chr7	1.6	4.1	85139	921608	836469	jgi.p|Lenedo1|1072031	804866	805716	hypothetical protein LENED_000757
cochr7.1	chr7	1.6	4.1	85139	921608	836469	jgi.p|Lenedo1|1053516	806037	806803	predicted protein
cochr7.1	chr7	1.6	4.1	85139	921608	836469	jgi.p|Lenedo1|1162326	807090	808005	rrna-processing protein efg1
cochr7.1	chr7	1.6	4.1	85139	921608	836469	jgi.p|Lenedo1|1053424	808379	813279	pol ii transcription elongation factor
cochr7.1	chr7	1.6	4.1	85139	921608	836469	jgi.p|Lenedo1|513351	813654	816372	predicted protein
cochr7.1	chr7	1.6	4.1	85139	921608	836469	jgi.p|Lenedo1|513413	816883	818529	hypothetical protein LENED_000751
cochr7.1	chr7	1.6	4.1	85139	921608	836469	jgi.p|Lenedo1|1119125	819146	822132	hypothetical protein LENED_000750
cochr7.1	chr7	1.6	4.1	85139	921608	836469	jgi.p|Lenedo1|1119130	823051	824651	---NA---
cochr7.1	chr7	1.6	4.1	85139	921608	836469	jgi.p|Lenedo1|513515	828033	828591	---NA---
cochr7.1	chr7	1.6	4.1	85139	921608	836469	jgi.p|Lenedo1|1119132	828667	830723	hypothetical protein LENED_000542
cochr7.1	chr7	1.6	4.1	85139	921608	836469	jgi.p|Lenedo1|1174015	833452	835375	predicted protein
cochr7.1	chr7	1.6	4.1	85139	921608	836469	jgi.p|Lenedo1|1053425	835683	836066	predicted protein
cochr7.1	chr7	1.6	4.1	85139	921608	836469	jgi.p|Lenedo1|1053447	838055	839792	predicted protein
cochr7.1	chr7	1.6	4.1	85139	921608	836469	jgi.p|Lenedo1|513922	840538	842495	hypothetical protein LENED_000747
cochr7.1	chr7	1.6	4.1	85139	921608	836469	jgi.p|Lenedo1|513790	843513	845671	predicted protein
cochr7.1	chr7	1.6	4.1	85139	921608	836469	jgi.p|Lenedo1|1119151	846395	847473	hypothetical protein LENED_006687
cochr7.1	chr7	1.6	4.1	85139	921608	836469	jgi.p|Lenedo1|1053401	849927	852540	hypothetical protein HYPSUDRAFT_151029
cochr7.1	chr7	1.6	4.1	85139	921608	836469	jgi.p|Lenedo1|1174021	854648	857233	fad fmn-containing dehydrogenase
cochr7.1	chr7	1.6	4.1	85139	921608	836469	jgi.p|Lenedo1|1174022	857562	860662	rho guanyl nucleotide exchange
cochr7.1	chr7	1.6	4.1	85139	921608	836469	jgi.p|Lenedo1|1072047	862431	866167	calcium-transporting ATPase
cochr7.1	chr7	1.6	4.1	85139	921608	836469	jgi.p|Lenedo1|1119170	867714	869952	hypothetical protein GYMLUDRAFT_43442
cochr7.1	chr7	1.6	4.1	85139	921608	836469	jgi.p|Lenedo1|514163	870188	873931	putative zinc metalloprotease
cochr7.1	chr7	1.6	4.1	85139	921608	836469	jgi.p|Lenedo1|1020641	880805	882354	mitochondrial carrier
cochr7.1	chr7	1.6	4.1	85139	921608	836469	jgi.p|Lenedo1|1273810	884571	887090	predicted protein
cochr7.1	chr7	1.6	4.1	85139	921608	836469	jgi.p|Lenedo1|1119178	887156	888767	predicted protein
cochr7.1	chr7	1.6	4.1	85139	921608	836469	jgi.p|Lenedo1|1072052	888416	890669	hypothetical protein LENED_008382
cochr7.1	chr7	1.6	4.1	85139	921608	836469	jgi.p|Lenedo1|1174029	893300	893764	differentiation regulator
cochr7.1	chr7	1.6	4.1	85139	921608	836469	jgi.p|Lenedo1|1053567	894226	896625	differentiation regulator
cochr7.1	chr7	1.6	4.1	85139	921608	836469	jgi.p|Lenedo1|1053580	897863	899439	general substrate transporter
cochr7.1	chr7	1.6	4.1	85139	921608	836469	jgi.p|Lenedo1|1072055	900288	902470	Repressor ROX1
cochr7.1	chr7	1.6	4.1	85139	921608	836469	jgi.p|Lenedo1|515147	905250	907235	Aldo/keto reductase
cochr7.1	chr7	1.6	4.1	85139	921608	836469	jgi.p|Lenedo1|1174034	907250	908895	hypothetical protein LENED_000735
cochr7.1	chr7	1.6	4.1	85139	921608	836469	jgi.p|Lenedo1|1162339	909515	910777	Programmed cell death protein 6
cochr7.1	chr7	1.6	4.1	85139	921608	836469	jgi.p|Lenedo1|1119223	910947	915270	saga complex protein
cochr7.1	chr7	1.6	4.1	85139	921608	836469	jgi.p|Lenedo1|1053615	916235	918755	hypothetical protein LENED_005091
cochr7.1	chr7	1.6	4.1	85139	921608	836469	jgi.p|Lenedo1|1119226	919812	920339	---NA---
cochr7.1	chr7	1.6	4.1	85139	921608	836469	jgi.p|Lenedo1|1053306	920914	926032	pleiotropic drug resistance ABC transporter
cochr7.1	chr7	1.6	4.1	85139	921608	836469	jgi.p|Lenedo1|1073521	86024	87394	reverse transcriptase ribonuclease h
cochr7.1	chr7	1.6	4.1	85139	921608	836469	jgi.p|Lenedo1|1073522	91314	93538	hypothetical protein LENED_006926
cochr7.1	chr7	1.6	4.1	85139	921608	836469	jgi.p|Lenedo1|665085	94063	96130	hypothetical protein GYMLUDRAFT_38511
cochr7.1	chr7	1.6	4.1	85139	921608	836469	jgi.p|Lenedo1|665125	97469	98782	hypothetical protein LENED_012779
cochr7.1	chr7	1.6	4.1	85139	921608	836469	jgi.p|Lenedo1|665326	100457	103851	laccase 1
cochr7.1	chr7	1.6	4.1	85139	921608	836469	jgi.p|Lenedo1|1175972	108850	109891	hypothetical protein GYMLUDRAFT_258496
cochr7.1	chr7	1.6	4.1	85139	921608	836469	jgi.p|Lenedo1|665487	110384	111549	hypothetical protein LENED_005171
cochr7.1	chr7	1.6	4.1	85139	921608	836469	jgi.p|Lenedo1|665357	112184	113623	glutathione S-transferase C-terminal-like protein
cochr7.1	chr7	1.6	4.1	85139	921608	836469	jgi.p|Lenedo1|1175975	113872	114702	CFEM domain-containing protein
cochr7.1	chr7	1.6	4.1	85139	921608	836469	jgi.p|Lenedo1|1073529	115653	116620	---NA---
cochr7.1	chr7	1.6	4.1	85139	921608	836469	jgi.p|Lenedo1|1240637	116918	119098	hypothetical protein LENED_005174
cochr7.1	chr7	1.6	4.1	85139	921608	836469	jgi.p|Lenedo1|665687	125087	127567	aryl sulfotransferase
cochr7.1	chr7	1.6	4.1	85139	921608	836469	jgi.p|Lenedo1|1258461	127531	130696	abc domain-containing protein
cochr7.1	chr7	1.6	4.1	85139	921608	836469	jgi.p|Lenedo1|665660	130880	132938	hypothetical protein LENED_005181
cochr7.1	chr7	1.6	4.1	85139	921608	836469	jgi.p|Lenedo1|1175983	133977	134806	hypothetical protein LENED_005182
cochr7.1	chr7	1.6	4.1	85139	921608	836469	jgi.p|Lenedo1|1175984	139945	140800	sec7 guanine nucleotide exchange factor
cochr7.1	chr7	1.6	4.1	85139	921608	836469	jgi.p|Lenedo1|1175985	141820	142677	predicted protein
cochr7.1	chr7	1.6	4.1	85139	921608	836469	jgi.p|Lenedo1|1175986	143766	146417	protein
cochr7.1	chr7	1.6	4.1	85139	921608	836469	jgi.p|Lenedo1|1175987	146984	147313	---NA---
cochr7.1	chr7	1.6	4.1	85139	921608	836469	jgi.p|Lenedo1|1175988	148068	149809	WD40 repeat-like protein
cochr7.1	chr7	1.6	4.1	85139	921608	836469	jgi.p|Lenedo1|1175989	150150	150600	hypothetical protein LENED_008320
cochr7.1	chr7	1.6	4.1	85139	921608	836469	jgi.p|Lenedo1|1175990	151774	153928	hypothetical protein LENED_003104
cochr7.1	chr7	1.6	4.1	85139	921608	836469	jgi.p|Lenedo1|1001079	155725	155993	hypothetical protein M422DRAFT_160667, partial
cochr7.1	chr7	1.6	4.1	85139	921608	836469	jgi.p|Lenedo1|1175992	156341	157610	hypothetical protein LENED_010272
cochr7.1	chr7	1.6	4.1	85139	921608	836469	jgi.p|Lenedo1|1175993	158008	158935	hypothetical protein LENED_012149
cochr7.1	chr7	1.6	4.1	85139	921608	836469	jgi.p|Lenedo1|1175994	159128	159956	hypothetical protein GYMLUDRAFT_62288
cochr7.1	chr7	1.6	4.1	85139	921608	836469	jgi.p|Lenedo1|997350	161230	162814	hypothetical protein GYMLUDRAFT_170570
cochr7.1	chr7	1.6	4.1	85139	921608	836469	jgi.p|Lenedo1|1073542	163879	164651	---NA---
cochr7.1	chr7	1.6	4.1	85139	921608	836469	jgi.p|Lenedo1|1175997	164736	165848	hypothetical protein LENED_010272
cochr7.1	chr7	1.6	4.1	85139	921608	836469	jgi.p|Lenedo1|1073543	166979	168059	---NA---
cochr7.1	chr7	1.6	4.1	85139	921608	836469	jgi.p|Lenedo1|1175998	168796	169773	tyrosine recombinase
cochr7.1	chr7	1.6	4.1	85139	921608	836469	jgi.p|Lenedo1|1073545	178177	180907	predicted protein
cochr7.1	chr7	1.6	4.1	85139	921608	836469	jgi.p|Lenedo1|1057775	181619	181993	hypothetical protein GYMLUDRAFT_377235
cochr7.1	chr7	1.6	4.1	85139	921608	836469	jgi.p|Lenedo1|1073546	182810	183839	predicted protein
cochr7.1	chr7	1.6	4.1	85139	921608	836469	jgi.p|Lenedo1|1073547	189411	190082	---NA---
cochr7.1	chr7	1.6	4.1	85139	921608	836469	jgi.p|Lenedo1|1073548	196440	199661	hypothetical protein LENED_004617
cochr7.1	chr7	1.6	4.1	85139	921608	836469	jgi.p|Lenedo1|1163274	201201	201750	hsp10-like protein
cochr7.1	chr7	1.6	4.1	85139	921608	836469	jgi.p|Lenedo1|1073550	202180	204519	glycoside hydrolase family 5 protein
cochr7.1	chr7	1.6	4.1	85139	921608	836469	jgi.p|Lenedo1|1176007	205624	207481	glycoside hydrolase family 5 protein
cochr7.1	chr7	1.6	4.1	85139	921608	836469	jgi.p|Lenedo1|1057718	208141	209291	carbohydrate esterase family 16 protein
cochr7.1	chr7	1.6	4.1	85139	921608	836469	jgi.p|Lenedo1|666463	211223	215721	carbohydrate-binding module family 1 protein
cochr7.1	chr7	1.6	4.1	85139	921608	836469	jgi.p|Lenedo1|1240644	215932	217565	FMN-linked oxidoreductase
cochr7.1	chr7	1.6	4.1	85139	921608	836469	jgi.p|Lenedo1|1073555	218477	219834	Protein kinase-like domain
cochr7.1	chr7	1.6	4.1	85139	921608	836469	jgi.p|Lenedo1|1176012	220132	220546	---NA---
cochr7.1	chr7	1.6	4.1	85139	921608	836469	jgi.p|Lenedo1|1073556	221610	222473	reverse transcriptase ribonuclease h
cochr7.1	chr7	1.6	4.1	85139	921608	836469	jgi.p|Lenedo1|1057759	232035	233435	tyrosine recombinase
cochr7.1	chr7	1.6	4.1	85139	921608	836469	jgi.p|Lenedo1|1176017	234536	235669	hypothetical protein LENED_004626
cochr7.1	chr7	1.6	4.1	85139	921608	836469	jgi.p|Lenedo1|1073559	238570	240098	hypothetical protein LENED_004629
cochr7.1	chr7	1.6	4.1	85139	921608	836469	jgi.p|Lenedo1|1127987	240198	243244	predicted protein
cochr7.1	chr7	1.6	4.1	85139	921608	836469	jgi.p|Lenedo1|1127992	243245	244246	---NA---
cochr7.1	chr7	1.6	4.1	85139	921608	836469	jgi.p|Lenedo1|1176022	245232	246509	hypothetical protein LENED_004631
cochr7.1	chr7	1.6	4.1	85139	921608	836469	jgi.p|Lenedo1|1073562	247671	248752	hypothetical protein LENED_004633
cochr7.1	chr7	1.6	4.1	85139	921608	836469	jgi.p|Lenedo1|1176024	249349	249784	cell cycle arrest in response to pheromone-related protein
cochr7.1	chr7	1.6	4.1	85139	921608	836469	jgi.p|Lenedo1|1057703	251606	252058	predicted protein
cochr7.1	chr7	1.6	4.1	85139	921608	836469	jgi.p|Lenedo1|1176026	253477	255199	protein kinase subdomain-containing protein PKL/CAK/Fmp29
cochr7.1	chr7	1.6	4.1	85139	921608	836469	jgi.p|Lenedo1|666865	255932	259403	predicted protein
cochr7.1	chr7	1.6	4.1	85139	921608	836469	jgi.p|Lenedo1|667129	258916	261144	hypothetical protein LENED_008576
cochr7.1	chr7	1.6	4.1	85139	921608	836469	jgi.p|Lenedo1|666955	261939	263212	hypothetical protein LENED_004639
cochr7.1	chr7	1.6	4.1	85139	921608	836469	jgi.p|Lenedo1|1128059	272691	273537	hypothetical protein LENED_004640
cochr7.1	chr7	1.6	4.1	85139	921608	836469	jgi.p|Lenedo1|1268265	274355	274898	---NA---
cochr7.1	chr7	1.6	4.1	85139	921608	836469	jgi.p|Lenedo1|1154409	275512	278392	MFS general substrate transporter
cochr7.1	chr7	1.6	4.1	85139	921608	836469	jgi.p|Lenedo1|1073570	280313	282516	predicted protein
cochr7.1	chr7	1.6	4.1	85139	921608	836469	jgi.p|Lenedo1|1268267	283687	285533	hypothetical protein LENED_008093
cochr7.1	chr7	1.6	4.1	85139	921608	836469	jgi.p|Lenedo1|1268268	285645	286464	hypothetical protein LENED_004643
cochr7.1	chr7	1.6	4.1	85139	921608	836469	jgi.p|Lenedo1|1176037	293522	294308	hypothetical protein LENED_008100
cochr7.1	chr7	1.6	4.1	85139	921608	836469	jgi.p|Lenedo1|1073574	297269	298423	---NA---
cochr7.1	chr7	1.6	4.1	85139	921608	836469	jgi.p|Lenedo1|1128083	305622	308977	cytochrome P450
cochr7.1	chr7	1.6	4.1	85139	921608	836469	jgi.p|Lenedo1|1057749	310732	311931	hypothetical protein LENED_004874
cochr7.1	chr7	1.6	4.1	85139	921608	836469	jgi.p|Lenedo1|1154418	312374	313254	predicted protein
cochr7.1	chr7	1.6	4.1	85139	921608	836469	jgi.p|Lenedo1|1128087	313389	314332	hypothetical protein LENED_004871
cochr7.1	chr7	1.6	4.1	85139	921608	836469	jgi.p|Lenedo1|1128092	314333	315831	predicted protein
cochr7.1	chr7	1.6	4.1	85139	921608	836469	jgi.p|Lenedo1|1154422	316953	317829	predicted protein
cochr7.1	chr7	1.6	4.1	85139	921608	836469	jgi.p|Lenedo1|1128095	318198	319559	predicted protein
cochr7.1	chr7	1.6	4.1	85139	921608	836469	jgi.p|Lenedo1|1128098	319624	321056	---NA---
cochr7.1	chr7	1.6	4.1	85139	921608	836469	jgi.p|Lenedo1|1073582	326473	327139	hypothetical protein LENED_012038
cochr7.1	chr7	1.6	4.1	85139	921608	836469	jgi.p|Lenedo1|668208	328190	331094	drug:h+ antiporter
cochr7.1	chr7	1.6	4.1	85139	921608	836469	jgi.p|Lenedo1|1057743	331244	332537	hypothetical protein LENED_001776
cochr7.1	chr7	1.6	4.1	85139	921608	836469	jgi.p|Lenedo1|1073584	334792	335698	hypothetical protein LENED_012042
cochr7.1	chr7	1.6	4.1	85139	921608	836469	jgi.p|Lenedo1|1176048	336250	338111	predicted protein
cochr7.1	chr7	1.6	4.1	85139	921608	836469	jgi.p|Lenedo1|1176049	340549	340827	drug:h+ antiporter
cochr7.1	chr7	1.6	4.1	85139	921608	836469	jgi.p|Lenedo1|1128128	341108	342293	hypothetical protein LENED_012038
cochr7.1	chr7	1.6	4.1	85139	921608	836469	jgi.p|Lenedo1|1163288	342888	345325	hypothetical protein LENED_012103
cochr7.1	chr7	1.6	4.1	85139	921608	836469	jgi.p|Lenedo1|1057696	348574	349002	hypothetical protein LENED_003317
cochr7.1	chr7	1.6	4.1	85139	921608	836469	jgi.p|Lenedo1|1073589	349396	349847	---NA---
cochr7.1	chr7	1.6	4.1	85139	921608	836469	jgi.p|Lenedo1|1015784	350190	350542	hypothetical protein LENED_012035
cochr7.1	chr7	1.6	4.1	85139	921608	836469	jgi.p|Lenedo1|1020673	353718	354038	hypothetical protein LENED_012036
cochr7.1	chr7	1.6	4.1	85139	921608	836469	jgi.p|Lenedo1|1057988	360624	361288	cytoplasmic protein
cochr7.1	chr7	1.6	4.1	85139	921608	836469	jgi.p|Lenedo1|668703	361630	364194	predicted protein
cochr7.1	chr7	1.6	4.1	85139	921608	836469	jgi.p|Lenedo1|1128136	364393	365777	Non-catalytic module family EXPN protein
cochr7.1	chr7	1.6	4.1	85139	921608	836469	jgi.p|Lenedo1|1128138	365815	366597	hypothetical protein LENED_008969
cochr7.1	chr7	1.6	4.1	85139	921608	836469	jgi.p|Lenedo1|668837	370943	372830	hypothetical protein GYMLUDRAFT_278627
cochr7.1	chr7	1.6	4.1	85139	921608	836469	jgi.p|Lenedo1|1073595	373576	374297	hypothetical protein PHLGIDRAFT_119496
cochr7.1	chr7	1.6	4.1	85139	921608	836469	jgi.p|Lenedo1|1073596	382035	382684	hypothetical protein LENED_001807
cochr7.1	chr7	1.6	4.1	85139	921608	836469	jgi.p|Lenedo1|1268286	389559	390437	---NA---
cochr7.1	chr7	1.6	4.1	85139	921608	836469	jgi.p|Lenedo1|1163292	390522	393049	cytochrome p450
cochr7.1	chr7	1.6	4.1	85139	921608	836469	jgi.p|Lenedo1|669684	393222	395828	cytochrome p450
cochr7.1	chr7	1.6	4.1	85139	921608	836469	jgi.p|Lenedo1|1213429	396059	398892	cytochrome p450
cochr7.1	chr7	1.6	4.1	85139	921608	836469	jgi.p|Lenedo1|1073602	399128	401688	cytochrome p450
cochr7.1	chr7	1.6	4.1	85139	921608	836469	jgi.p|Lenedo1|668949	401781	404946	PLP-dependent transferase
cochr7.1	chr7	1.6	4.1	85139	921608	836469	jgi.p|Lenedo1|1058092	409693	411959	pseudouridine synthase
cochr7.1	chr7	1.6	4.1	85139	921608	836469	jgi.p|Lenedo1|1128196	412059	413705	WD40 repeat-like protein
cochr7.1	chr7	1.6	4.1	85139	921608	836469	jgi.p|Lenedo1|1128197	413727	417417	DUF1620-domain-containing protein
cochr7.1	chr7	1.6	4.1	85139	921608	836469	jgi.p|Lenedo1|1176074	418544	418769	fungal hydrophobin
cochr7.1	chr7	1.6	4.1	85139	921608	836469	jgi.p|Lenedo1|1176075	419514	421220	hypothetical protein GYMLUDRAFT_244030
cochr7.1	chr7	1.6	4.1	85139	921608	836469	jgi.p|Lenedo1|1268295	421518	422400	hypothetical protein LENED_001796
cochr7.1	chr7	1.6	4.1	85139	921608	836469	jgi.p|Lenedo1|1213481	422643	423999	PQ-loop-domain-containing protein
cochr7.1	chr7	1.6	4.1	85139	921608	836469	jgi.p|Lenedo1|1128226	424907	426395	predicted protein
cochr7.1	chr7	1.6	4.1	85139	921608	836469	jgi.p|Lenedo1|1176078	429020	429904	predicted protein
cochr7.1	chr7	1.6	4.1	85139	921608	836469	jgi.p|Lenedo1|1176079	429932	431735	beach-domain-containing protein
cochr7.1	chr7	1.6	4.1	85139	921608	836469	jgi.p|Lenedo1|1176080	431983	433349	proline-rich protein
cochr7.1	chr7	1.6	4.1	85139	921608	836469	jgi.p|Lenedo1|1019081	434200	434544	hypothetical protein GYMLUDRAFT_167130
cochr7.1	chr7	1.6	4.1	85139	921608	836469	jgi.p|Lenedo1|1213485	434662	435498	kinase-like protein
cochr7.1	chr7	1.6	4.1	85139	921608	836469	jgi.p|Lenedo1|1057859	435561	436542	hypothetical protein LENED_007942
cochr7.1	chr7	1.6	4.1	85139	921608	836469	jgi.p|Lenedo1|1013443	442389	443449	predicted protein
cochr7.1	chr7	1.6	4.1	85139	921608	836469	jgi.p|Lenedo1|1005112	443660	444289	predicted protein
cochr7.1	chr7	1.6	4.1	85139	921608	836469	jgi.p|Lenedo1|1176084	445231	447118	proline-rich protein
cochr7.1	chr7	1.6	4.1	85139	921608	836469	jgi.p|Lenedo1|1176085	447792	448406	Zinc/cadmium resistance protein
cochr7.1	chr7	1.6	4.1	85139	921608	836469	jgi.p|Lenedo1|1176086	448732	450223	Zinc/cadmium resistance protein
cochr7.1	chr7	1.6	4.1	85139	921608	836469	jgi.p|Lenedo1|1002552	451160	451877	WD40 repeat-like protein
cochr7.1	chr7	1.6	4.1	85139	921608	836469	jgi.p|Lenedo1|1176088	452879	454626	---NA---
cochr7.1	chr7	1.6	4.1	85139	921608	836469	jgi.p|Lenedo1|1058087	456140	457132	isoform b
cochr7.1	chr7	1.6	4.1	85139	921608	836469	jgi.p|Lenedo1|1073620	457986	463102	predicted protein
cochr7.1	chr7	1.6	4.1	85139	921608	836469	jgi.p|Lenedo1|1176090	463714	464488	SPRY-domain-containing protein
cochr7.1	chr7	1.6	4.1	85139	921608	836469	jgi.p|Lenedo1|1176091	464703	466068	aldos-2-ulose dehydratase
cochr7.1	chr7	1.6	4.1	85139	921608	836469	jgi.p|Lenedo1|1213490	469074	469590	arsenical pump membrane protein
cochr7.1	chr7	1.6	4.1	85139	921608	836469	jgi.p|Lenedo1|1128233	470549	473130	predicted protein
cochr7.1	chr7	1.6	4.1	85139	921608	836469	jgi.p|Lenedo1|1128238	473383	474954	hypothetical protein LENED_001791
cochr7.1	chr7	1.6	4.1	85139	921608	836469	jgi.p|Lenedo1|670131	475418	477436	hypothetical protein LENED_001790
cochr7.1	chr7	1.6	4.1	85139	921608	836469	jgi.p|Lenedo1|670242	478542	479817	hypothetical protein LENED_001787
cochr7.1	chr7	1.6	4.1	85139	921608	836469	jgi.p|Lenedo1|1128268	480166	481275	---NA---
cochr7.1	chr7	1.6	4.1	85139	921608	836469	jgi.p|Lenedo1|1176097	482218	488607	predicted protein
cochr7.1	chr7	1.6	4.1	85139	921608	836469	jgi.p|Lenedo1|670539	490200	491129	hypothetical protein LENED_006556
cochr7.1	chr7	1.6	4.1	85139	921608	836469	jgi.p|Lenedo1|1073628	491868	492717	hypothetical protein GYMLUDRAFT_598560
cochr7.1	chr7	1.6	4.1	85139	921608	836469	jgi.p|Lenedo1|670558	492765	493169	---NA---
cochr7.1	chr7	1.6	4.1	85139	921608	836469	jgi.p|Lenedo1|1128279	493296	495532	hypothetical protein LENED_001784
cochr7.1	chr7	1.6	4.1	85139	921608	836469	jgi.p|Lenedo1|1000134	497672	498679	tyrosine recombinase
cochr7.1	chr7	1.6	4.1	85139	921608	836469	jgi.p|Lenedo1|1001041	503013	504510	predicted protein
cochr7.1	chr7	1.6	4.1	85139	921608	836469	jgi.p|Lenedo1|1058050	504896	507039	aldehyde dehydrogenase
cochr7.1	chr7	1.6	4.1	85139	921608	836469	jgi.p|Lenedo1|1128292	508341	510533	GCC2 and GCC3 domain protein
cochr7.1	chr7	1.6	4.1	85139	921608	836469	jgi.p|Lenedo1|1128303	510929	513901	glycoside hydrolase family 30 protein
cochr7.1	chr7	1.6	4.1	85139	921608	836469	jgi.p|Lenedo1|1128307	514500	514931	---NA---
cochr7.1	chr7	1.6	4.1	85139	921608	836469	jgi.p|Lenedo1|1128312	514932	516247	Metallo-dependent phosphatase
cochr7.1	chr7	1.6	4.1	85139	921608	836469	jgi.p|Lenedo1|1128317	516842	518628	carbohydrate esterase family 16 protein
cochr7.1	chr7	1.6	4.1	85139	921608	836469	jgi.p|Lenedo1|671589	518744	519903	hypothetical protein LENED_001778
cochr7.1	chr7	1.6	4.1	85139	921608	836469	jgi.p|Lenedo1|671805	519767	521343	predicted protein
cochr7.1	chr7	1.6	4.1	85139	921608	836469	jgi.p|Lenedo1|1058098	521898	523255	predicted protein
cochr7.1	chr7	1.6	4.1	85139	921608	836469	jgi.p|Lenedo1|1128327	523350	525467	Acireductone dioxygenase
cochr7.1	chr7	1.6	4.1	85139	921608	836469	jgi.p|Lenedo1|1128331	525468	526808	predicted protein
cochr7.1	chr7	1.6	4.1	85139	921608	836469	jgi.p|Lenedo1|1176112	527404	528657	hypothetical protein LENED_001774
cochr7.1	chr7	1.6	4.1	85139	921608	836469	jgi.p|Lenedo1|1163308	529229	530737	predicted protein
cochr7.1	chr7	1.6	4.1	85139	921608	836469	jgi.p|Lenedo1|671938	538817	539766	glycoside hydrolase family 29 protein
cochr7.1	chr7	1.6	4.1	85139	921608	836469	jgi.p|Lenedo1|1176116	539775	545043	predicted protein
cochr7.1	chr7	1.6	4.1	85139	921608	836469	jgi.p|Lenedo1|1128375	548112	549710	4 histone acetyltransferase complex component yng2
cochr7.1	chr7	1.6	4.1	85139	921608	836469	jgi.p|Lenedo1|672206	549861	551274	NAD P-binding protein
cochr7.1	chr7	1.6	4.1	85139	921608	836469	jgi.p|Lenedo1|1057977	554177	554488	predicted protein
cochr7.1	chr7	1.6	4.1	85139	921608	836469	jgi.p|Lenedo1|1058033	554544	561313	rho gtpase activating protein 22
cochr7.1	chr7	1.6	4.1	85139	921608	836469	jgi.p|Lenedo1|1176120	563157	564526	predicted protein
cochr7.1	chr7	1.6	4.1	85139	921608	836469	jgi.p|Lenedo1|1213619	564779	566506	predicted protein
cochr7.1	chr7	1.6	4.1	85139	921608	836469	jgi.p|Lenedo1|1258587	566942	568511	predicted protein
cochr7.1	chr7	1.6	4.1	85139	921608	836469	jgi.p|Lenedo1|672325	569820	571700	hypothetical protein LENED_001449
cochr7.1	chr7	1.6	4.1	85139	921608	836469	jgi.p|Lenedo1|1258594	571752	573147	predicted protein
cochr7.1	chr7	1.6	4.1	85139	921608	836469	jgi.p|Lenedo1|672417	574878	576558	hypothetical protein LENED_001449
cochr7.1	chr7	1.6	4.1	85139	921608	836469	jgi.p|Lenedo1|1073653	576682	578028	predicted protein
cochr7.1	chr7	1.6	4.1	85139	921608	836469	jgi.p|Lenedo1|1268328	579232	581405	hypothetical protein LENED_002310
cochr7.1	chr7	1.6	4.1	85139	921608	836469	jgi.p|Lenedo1|1176128	581576	582924	predicted protein
cochr7.1	chr7	1.6	4.1	85139	921608	836469	jgi.p|Lenedo1|673423	584038	585471	hypothetical protein LENED_007762
cochr7.1	chr7	1.6	4.1	85139	921608	836469	jgi.p|Lenedo1|672980	585374	586564	hypothetical protein GYMLUDRAFT_87539
cochr7.1	chr7	1.6	4.1	85139	921608	836469	jgi.p|Lenedo1|1176131	588126	589897	Cupredoxin
cochr7.1	chr7	1.6	4.1	85139	921608	836469	jgi.p|Lenedo1|1073659	595096	595572	hypothetical protein GYMLUDRAFT_43520
cochr7.1	chr7	1.6	4.1	85139	921608	836469	jgi.p|Lenedo1|1057959	596223	596839	fungal hydrophobin
cochr7.1	chr7	1.6	4.1	85139	921608	836469	jgi.p|Lenedo1|1176135	598692	599296	fungal hydrophobin
cochr7.1	chr7	1.6	4.1	85139	921608	836469	jgi.p|Lenedo1|1128533	599784	600772	fungal hydrophobin
cochr7.1	chr7	1.6	4.1	85139	921608	836469	jgi.p|Lenedo1|1163316	600878	602656	mitochondrial import inner membrane translocase subunit tim50
cochr7.1	chr7	1.6	4.1	85139	921608	836469	jgi.p|Lenedo1|1176137	604264	606113	hypothetical protein LENED_007770
cochr7.1	chr7	1.6	4.1	85139	921608	836469	jgi.p|Lenedo1|1057843	606621	608658	predicted protein
cochr7.1	chr7	1.6	4.1	85139	921608	836469	jgi.p|Lenedo1|1017286	613182	613726	hypothetical protein MPER_16027, partial
cochr7.1	chr7	1.6	4.1	85139	921608	836469	jgi.p|Lenedo1|1176141	621132	621770	hypothetical protein CDD81_4201
cochr7.1	chr7	1.6	4.1	85139	921608	836469	jgi.p|Lenedo1|1163319	629424	630803	predicted protein
cochr7.1	chr7	1.6	4.1	85139	921608	836469	jgi.p|Lenedo1|999639	632778	633059	predicted protein
cochr8.1	chr1	94.2	99.9	2411587	2528912	117325	jgi.p|Lenedo1|1259175	2410940	2412491	hypothetical protein LENED_005643
cochr8.1	chr1	94.2	99.9	2411587	2528912	117325	jgi.p|Lenedo1|727413	2412401	2413657	cytokinin riboside 5 -monophosphate phosphoribohydrolase LOGL2
cochr8.1	chr1	94.2	99.9	2411587	2528912	117325	jgi.p|Lenedo1|1059089	2413711	2418091	abc transporter
cochr8.1	chr1	94.2	99.9	2411587	2528912	117325	jgi.p|Lenedo1|1002814	2436491	2436928	cellulosomal scaffoldin anchoring protein
cochr8.1	chr1	94.2	99.9	2411587	2528912	117325	jgi.p|Lenedo1|1073938	2438836	2441245	hypothetical protein SERLADRAFT_412378
cochr8.1	chr1	94.2	99.9	2411587	2528912	117325	jgi.p|Lenedo1|729804	2446375	2447335	WD40 repeat-like protein
cochr8.1	chr1	94.2	99.9	2411587	2528912	117325	jgi.p|Lenedo1|1130111	2448082	2450013	tryptophanyl-trna synthetase
cochr8.1	chr1	94.2	99.9	2411587	2528912	117325	jgi.p|Lenedo1|1130112	2450014	2451406	predicted protein
cochr8.1	chr1	94.2	99.9	2411587	2528912	117325	jgi.p|Lenedo1|729638	2451343	2451929	rolly protein
cochr8.1	chr1	94.2	99.9	2411587	2528912	117325	jgi.p|Lenedo1|1073941	2452994	2454243	TBP-domain-containing protein
cochr8.1	chr1	94.2	99.9	2411587	2528912	117325	jgi.p|Lenedo1|1073942	2456573	2458348	glycoside hydrolase family 16 protein
cochr8.1	chr1	94.2	99.9	2411587	2528912	117325	jgi.p|Lenedo1|1163485	2458938	2461663	vacuolar sorting protein 1
cochr8.1	chr1	94.2	99.9	2411587	2528912	117325	jgi.p|Lenedo1|1130133	2461770	2463927	glycoside hydrolase family 88 protein
cochr8.1	chr1	94.2	99.9	2411587	2528912	117325	jgi.p|Lenedo1|1059083	2464051	2466104	cytochrome P450
cochr8.1	chr1	94.2	99.9	2411587	2528912	117325	jgi.p|Lenedo1|1163488	2466414	2467012	nuclear transport factor 2
cochr8.1	chr1	94.2	99.9	2411587	2528912	117325	jgi.p|Lenedo1|1059108	2467165	2468644	predicted protein
cochr8.1	chr1	94.2	99.9	2411587	2528912	117325	jgi.p|Lenedo1|1130173	2471137	2471648	---NA---
cochr8.1	chr1	94.2	99.9	2411587	2528912	117325	jgi.p|Lenedo1|1176560	2474549	2476031	predicted protein
cochr8.1	chr1	94.2	99.9	2411587	2528912	117325	jgi.p|Lenedo1|1130188	2476478	2476915	---NA---
cochr8.1	chr1	94.2	99.9	2411587	2528912	117325	jgi.p|Lenedo1|1176561	2477450	2478181	predicted protein
cochr8.1	chr1	94.2	99.9	2411587	2528912	117325	jgi.p|Lenedo1|731020	2478495	2480504	extracellular exo-polygalacturonase
cochr8.1	chr1	94.2	99.9	2411587	2528912	117325	jgi.p|Lenedo1|1058954	2480594	2481278	FAM96B protein
cochr8.1	chr1	94.2	99.9	2411587	2528912	117325	jgi.p|Lenedo1|1176564	2481477	2481926	hypothetical protein GYMLUDRAFT_241463
cochr8.1	chr1	94.2	99.9	2411587	2528912	117325	jgi.p|Lenedo1|730982	2481976	2484790	D-lactate dehydrogenase cytochrome oxidoreductase
cochr8.1	chr1	94.2	99.9	2411587	2528912	117325	jgi.p|Lenedo1|731208	2485064	2490086	transcriptional repressor
cochr8.1	chr1	94.2	99.9	2411587	2528912	117325	jgi.p|Lenedo1|1059140	2490249	2491313	uracil-dna glycosylase
cochr8.1	chr1	94.2	99.9	2411587	2528912	117325	jgi.p|Lenedo1|1130203	2491691	2493816	predicted protein
cochr8.1	chr1	94.2	99.9	2411587	2528912	117325	jgi.p|Lenedo1|1130207	2494264	2494899	replication factor A protein 3
cochr8.1	chr1	94.2	99.9	2411587	2528912	117325	jgi.p|Lenedo1|731407	2494908	2496717	P-loop containing nucleoside triphosphate hydrolase protein
cochr8.1	chr1	94.2	99.9	2411587	2528912	117325	jgi.p|Lenedo1|731486	2496316	2497267	nudix hydrolase 1
cochr8.1	chr1	94.2	99.9	2411587	2528912	117325	jgi.p|Lenedo1|1059037	2497145	2497999	predicted protein
cochr8.1	chr1	94.2	99.9	2411587	2528912	117325	jgi.p|Lenedo1|1176572	2498297	2499765	alpha/beta-hydrolase
cochr8.1	chr1	94.2	99.9	2411587	2528912	117325	jgi.p|Lenedo1|1130223	2500808	2501737	hypothetical protein LENED_002523
cochr8.1	chr1	94.2	99.9	2411587	2528912	117325	jgi.p|Lenedo1|1059107	2503120	2504489	hypothetical protein LENED_004224
cochr8.1	chr1	94.2	99.9	2411587	2528912	117325	jgi.p|Lenedo1|1016715	2504969	2505441	programmed cell death protein 5
cochr8.1	chr1	94.2	99.9	2411587	2528912	117325	jgi.p|Lenedo1|731667	2505757	2507071	nuclear protein qri2
cochr8.1	chr1	94.2	99.9	2411587	2528912	117325	jgi.p|Lenedo1|731680	2507320	2509816	crossover junction endonuclease MUS81
cochr8.1	chr1	94.2	99.9	2411587	2528912	117325	jgi.p|Lenedo1|1130228	2510235	2514644	pab-dependent poly -specific ribonuclease subunit pan2
cochr8.1	chr1	94.2	99.9	2411587	2528912	117325	jgi.p|Lenedo1|1130231	2514645	2517194	glycoside hydrolase family 13 protein
cochr8.1	chr1	94.2	99.9	2411587	2528912	117325	jgi.p|Lenedo1|1130235	2517264	2519081	hypothetical protein GYMLUDRAFT_40817
cochr8.1	chr1	94.2	99.9	2411587	2528912	117325	jgi.p|Lenedo1|731840	2519372	2520619	hypothetical protein LENED_004231
cochr8.1	chr1	94.2	99.9	2411587	2528912	117325	jgi.p|Lenedo1|1268569	2521862	2522933	hypothetical protein LENED_004232
cochr8.1	chr1	94.2	99.9	2411587	2528912	117325	jgi.p|Lenedo1|1073965	2524077	2526173	hypothetical protein LENED_004234
cochr8.1	chr1	94.2	99.9	2411587	2528912	117325	jgi.p|Lenedo1|1073966	2528827	2529325	---NA---
cochr8.2	chr1	103.6	113.2	2529280	2566819	37539	jgi.p|Lenedo1|1073806	2566434	2567185	subtilisin-like protein
cochr8.2	chr1	103.6	113.2	2529280	2566819	37539	jgi.p|Lenedo1|1073966	2528827	2529325	---NA---
cochr8.2	chr1	103.6	113.2	2529280	2566819	37539	jgi.p|Lenedo1|1176584	2529695	2530555	hypothetical protein LENED_004236
cochr8.2	chr1	103.6	113.2	2529280	2566819	37539	jgi.p|Lenedo1|1073968	2538361	2539074	hypothetical protein LENED_004236
cochr8.2	chr1	103.6	113.2	2529280	2566819	37539	jgi.p|Lenedo1|1176589	2547103	2547911	hypothetical protein LENED_005581
cochr8.2	chr1	103.6	113.2	2529280	2566819	37539	jgi.p|Lenedo1|1073970	2548240	2551071	hypothetical protein LENED_005581
cochr8.2	chr1	103.6	113.2	2529280	2566819	37539	jgi.p|Lenedo1|1073971	2551349	2552015	predicted protein
cochr8.2	chr1	103.6	113.2	2529280	2566819	37539	jgi.p|Lenedo1|1176592	2552234	2552970	hypothetical protein GYMLUDRAFT_247688
cochr8.2	chr1	103.6	113.2	2529280	2566819	37539	jgi.p|Lenedo1|1176594	2554069	2554535	predicted protein
cochr8.2	chr1	103.6	113.2	2529280	2566819	37539	jgi.p|Lenedo1|1073973	2554636	2555802	hypothetical protein LENED_005582
cochr8.2	chr1	103.6	113.2	2529280	2566819	37539	jgi.p|Lenedo1|1073974	2558565	2561133	hypothetical protein GYMLUDRAFT_251035
hco.1	chr1	0	9.2	273940	283231	9291	jgi.p|Lenedo1|1057487	283184	284061	nuclear export factor
hco.1	chr1	0	9.2	273940	283231	9291	jgi.p|Lenedo1|656925	282206	283617	---NA---
hco.1	chr1	0	9.2	273940	283231	9291	jgi.p|Lenedo1|1019593	279486	279773	centromere protein B
hco.1	chr1	0	9.2	273940	283231	9291	jgi.p|Lenedo1|1057632	273833	275300	camp-independent regulatory protein
hco.2	chr2	69.8	80.5	3252418	3258226	5808	jgi.p|Lenedo1|1032489	3251681	3254294	homeodomain protein
hco.2	chr2	69.8	80.5	3252418	3258226	5808	jgi.p|Lenedo1|1261534	3255439	3256241	---NA---
hco.2	chr2	69.8	80.5	3252418	3258226	5808	jgi.p|Lenedo1|1064717	3256113	3257083	---NA---
hco.2	chr2	69.8	80.5	3252418	3258226	5808	jgi.p|Lenedo1|4317	3257909	3258630	hypothetical protein LENED_000294
tco.1	chr2	80.5	85	3257937	3725608	467671	jgi.p|Lenedo1|4317	3257909	3258630	hypothetical protein LENED_000294
tco.1	chr2	80.5	85	3257937	3725608	467671	jgi.p|Lenedo1|1232990	3258790	3263038	beta-flanking protein
tco.1	chr2	80.5	85	3257937	3725608	467671	jgi.p|Lenedo1|1164358	3263892	3264360	DUF2945 family
tco.1	chr2	80.5	85	3257937	3725608	467671	jgi.p|Lenedo1|1164359	3264719	3265929	hypothetical protein LENED_000291
tco.1	chr2	80.5	85	3257937	3725608	467671	jgi.p|Lenedo1|1157490	3268776	3271857	protein kinase
tco.1	chr2	80.5	85	3257937	3725608	467671	jgi.p|Lenedo1|1232994	3272170	3273640	Short-chain dehydrogenase reductase SDR
tco.1	chr2	80.5	85	3257937	3725608	467671	jgi.p|Lenedo1|1031188	3274512	3277618	protein kinase
tco.1	chr2	80.5	85	3257937	3725608	467671	jgi.p|Lenedo1|1232995	3279165	3280310	hypothetical protein LENED_009753
tco.1	chr2	80.5	85	3257937	3725608	467671	jgi.p|Lenedo1|1075859	3281953	3284306	f-box domain-containing protein
tco.1	chr2	80.5	85	3257937	3725608	467671	jgi.p|Lenedo1|1064725	3284387	3285218	putative conserved protein A-HP6
tco.1	chr2	80.5	85	3257937	3725608	467671	jgi.p|Lenedo1|1269613	3287045	3290184	predicted protein
tco.1	chr2	80.5	85	3257937	3725608	467671	jgi.p|Lenedo1|1031305	3291129	3292890	RNA polymerase II-associated protein
tco.1	chr2	80.5	85	3257937	3725608	467671	jgi.p|Lenedo1|1032176	3293497	3296817	glycosyltransferase family 8 protein
tco.1	chr2	80.5	85	3257937	3725608	467671	jgi.p|Lenedo1|1075884	3296944	3299691	protein kinase
tco.1	chr2	80.5	85	3257937	3725608	467671	jgi.p|Lenedo1|1164370	3299815	3302309	mitochondrial intermediate peptidase
tco.1	chr2	80.5	85	3257937	3725608	467671	jgi.p|Lenedo1|5256	3302475	3304813	predicted protein
tco.1	chr2	80.5	85	3257937	3725608	467671	jgi.p|Lenedo1|1075896	3304823	3305612	DUF1754-domain-containing protein
tco.1	chr2	80.5	85	3257937	3725608	467671	jgi.p|Lenedo1|1075897	3305614	3307184	eukaryotic integral membrane protein
tco.1	chr2	80.5	85	3257937	3725608	467671	jgi.p|Lenedo1|1032602	3307682	3310438	Vps51 Vps67 domain-containing protein
tco.1	chr2	80.5	85	3257937	3725608	467671	jgi.p|Lenedo1|1075906	3310810	3312157	predicted protein
tco.1	chr2	80.5	85	3257937	3725608	467671	jgi.p|Lenedo1|1164375	3312235	3312924	secE/sec61-gamma protein
tco.1	chr2	80.5	85	3257937	3725608	467671	jgi.p|Lenedo1|5682	3313015	3315275	pentatricopeptide repeat-containing protein
tco.1	chr2	80.5	85	3257937	3725608	467671	jgi.p|Lenedo1|4816	3315410	3319488	glycine dehydrogenase
tco.1	chr2	80.5	85	3257937	3725608	467671	jgi.p|Lenedo1|1164378	3320488	3321091	---NA---
tco.1	chr2	80.5	85	3257937	3725608	467671	jgi.p|Lenedo1|6908	3322373	3324567	SET domain-containing protein
tco.1	chr2	80.5	85	3257937	3725608	467671	jgi.p|Lenedo1|1031435	3324502	3325883	clavaminate synthase-like protein
tco.1	chr2	80.5	85	3257937	3725608	467671	jgi.p|Lenedo1|6219	3325958	3326952	E2 ubiquitin-conjugating enzyme
tco.1	chr2	80.5	85	3257937	3725608	467671	jgi.p|Lenedo1|1064738	3327062	3327601	transthyretin family protein
tco.1	chr2	80.5	85	3257937	3725608	467671	jgi.p|Lenedo1|1164382	3327718	3328914	Nop52-domain-containing protein
tco.1	chr2	80.5	85	3257937	3725608	467671	jgi.p|Lenedo1|1164383	3329003	3329981	f-box domain-containing protein
tco.1	chr2	80.5	85	3257937	3725608	467671	jgi.p|Lenedo1|1032066	3330384	3332496	f-box domain-containing protein
tco.1	chr2	80.5	85	3257937	3725608	467671	jgi.p|Lenedo1|1242240	3332515	3334759	Chromatin structure-remodeling complex subunit rsc9
tco.1	chr2	80.5	85	3257937	3725608	467671	jgi.p|Lenedo1|1233016	3334856	3337503	para-aminobenzoic acid synthetase
tco.1	chr2	80.5	85	3257937	3725608	467671	jgi.p|Lenedo1|1157508	3337541	3340989	heat repeat protein
tco.1	chr2	80.5	85	3257937	3725608	467671	jgi.p|Lenedo1|1164388	3341017	3342469	deoxycytidylate deaminase
tco.1	chr2	80.5	85	3257937	3725608	467671	jgi.p|Lenedo1|1075943	3342516	3343748	ribonucleases p mrp protein subunit pop3 kda subunit
tco.1	chr2	80.5	85	3257937	3725608	467671	jgi.p|Lenedo1|1032214	3343994	3345440	E set domain-containing protein
tco.1	chr2	80.5	85	3257937	3725608	467671	jgi.p|Lenedo1|7048	3345047	3347035	E set domain-containing
tco.1	chr2	80.5	85	3257937	3725608	467671	jgi.p|Lenedo1|1075955	3348644	3349658	predicted protein
tco.1	chr2	80.5	85	3257937	3725608	467671	jgi.p|Lenedo1|7131	3349724	3350273	---NA---
tco.1	chr2	80.5	85	3257937	3725608	467671	jgi.p|Lenedo1|7130	3350274	3351793	hypothetical protein LENED_000254
tco.1	chr2	80.5	85	3257937	3725608	467671	jgi.p|Lenedo1|1064745	3352386	3353899	DUF605-domain-containing protein
tco.1	chr2	80.5	85	3257937	3725608	467671	jgi.p|Lenedo1|7147	3355801	3356976	predicted protein
tco.1	chr2	80.5	85	3257937	3725608	467671	jgi.p|Lenedo1|1157509	3357095	3358078	Rhamnogalacturonan acetylesterase
tco.1	chr2	80.5	85	3257937	3725608	467671	jgi.p|Lenedo1|1075977	3358249	3360793	P-loop containing nucleoside triphosphate hydrolase protein
tco.1	chr2	80.5	85	3257937	3725608	467671	jgi.p|Lenedo1|1075978	3360835	3363098	S-adenosyl-L-methionine-dependent methyltransferase
tco.1	chr2	80.5	85	3257937	3725608	467671	jgi.p|Lenedo1|1164396	3363185	3366456	WD40 repeat-like protein
tco.1	chr2	80.5	85	3257937	3725608	467671	jgi.p|Lenedo1|1064749	3366781	3368661	predicted protein
tco.1	chr2	80.5	85	3257937	3725608	467671	jgi.p|Lenedo1|1075989	3369787	3372624	putative NAD(P)H-dependent D-xylose reductase xyl1
tco.1	chr2	80.5	85	3257937	3725608	467671	jgi.p|Lenedo1|1164399	3373455	3374504	LmbE-like protein
tco.1	chr2	80.5	85	3257937	3725608	467671	jgi.p|Lenedo1|7374	3374569	3376354	Aldo/keto reductase
tco.1	chr2	80.5	85	3257937	3725608	467671	jgi.p|Lenedo1|8426	3376356	3378425	putative 2-dehydropantoate 2-reductase
tco.1	chr2	80.5	85	3257937	3725608	467671	jgi.p|Lenedo1|1076000	3378382	3379930	ketopantoate reductase-like protein
tco.1	chr2	80.5	85	3257937	3725608	467671	jgi.p|Lenedo1|1076007	3380580	3383138	putative O-fucosyltransferase-like protein
tco.1	chr2	80.5	85	3257937	3725608	467671	jgi.p|Lenedo1|1164404	3383108	3384561	putative triose-phosphate transporter
tco.1	chr2	80.5	85	3257937	3725608	467671	jgi.p|Lenedo1|8684	3384912	3387712	putative 15-O-acetyltransferase Tri3
tco.1	chr2	80.5	85	3257937	3725608	467671	jgi.p|Lenedo1|1032571	3387706	3389906	tbc1 domain family member 14
tco.1	chr2	80.5	85	3257937	3725608	467671	jgi.p|Lenedo1|1076027	3389940	3392392	gamma-tubulin ring complex protein
tco.1	chr2	80.5	85	3257937	3725608	467671	jgi.p|Lenedo1|1031216	3392662	3393861	inorganic diphosphatase
tco.1	chr2	80.5	85	3257937	3725608	467671	jgi.p|Lenedo1|1031373	3394132	3398633	predicted protein
tco.1	chr2	80.5	85	3257937	3725608	467671	jgi.p|Lenedo1|1076034	3398757	3400310	ribonuclease iii
tco.1	chr2	80.5	85	3257937	3725608	467671	jgi.p|Lenedo1|1076038	3400311	3401334	thioredoxin-domain-containing protein
tco.1	chr2	80.5	85	3257937	3725608	467671	jgi.p|Lenedo1|1064762	3401549	3402688	elegans protein confirmed by transcript evidence
tco.1	chr2	80.5	85	3257937	3725608	467671	jgi.p|Lenedo1|9820	3404213	3406429	predicted protein
tco.1	chr2	80.5	85	3257937	3725608	467671	jgi.p|Lenedo1|1032224	3406705	3409071	glycosyltransferase family 22 protein
tco.1	chr2	80.5	85	3257937	3725608	467671	jgi.p|Lenedo1|9863	3409075	3410468	predicted protein
tco.1	chr2	80.5	85	3257937	3725608	467671	jgi.p|Lenedo1|9769	3411091	3414198	Protein polybromo-1
tco.1	chr2	80.5	85	3257937	3725608	467671	jgi.p|Lenedo1|1164416	3414411	3416624	hypothetical protein LENED_000225
tco.1	chr2	80.5	85	3257937	3725608	467671	jgi.p|Lenedo1|9021	3416628	3418898	palmitoyltransferase pfa4
tco.1	chr2	80.5	85	3257937	3725608	467671	jgi.p|Lenedo1|1164418	3418771	3420040	hypothetical protein LENED_000222
tco.1	chr2	80.5	85	3257937	3725608	467671	jgi.p|Lenedo1|1164419	3420265	3422506	hypothetical protein LENED_000221
tco.1	chr2	80.5	85	3257937	3725608	467671	jgi.p|Lenedo1|1261578	3422611	3425865	hypothetical protein LENED_000219
tco.1	chr2	80.5	85	3257937	3725608	467671	jgi.p|Lenedo1|1233047	3425876	3427993	NAF1-domain-containing protein
tco.1	chr2	80.5	85	3257937	3725608	467671	jgi.p|Lenedo1|1164422	3428107	3429075	elongation factor Ts, mitochondrial
tco.1	chr2	80.5	85	3257937	3725608	467671	jgi.p|Lenedo1|1164424	3429665	3430828	predicted protein
tco.1	chr2	80.5	85	3257937	3725608	467671	jgi.p|Lenedo1|1064772	3431046	3431638	predicted protein
tco.1	chr2	80.5	85	3257937	3725608	467671	jgi.p|Lenedo1|9703	3432184	3433646	alkaline phytoceramidase
tco.1	chr2	80.5	85	3257937	3725608	467671	jgi.p|Lenedo1|10120	3434205	3436026	hypothetical protein LENED_000214
tco.1	chr2	80.5	85	3257937	3725608	467671	jgi.p|Lenedo1|9889	3436309	3437276	hypothetical protein GYMLUDRAFT_65867
tco.1	chr2	80.5	85	3257937	3725608	467671	jgi.p|Lenedo1|1164428	3437665	3438641	hypothetical protein LENED_000213
tco.1	chr2	80.5	85	3257937	3725608	467671	jgi.p|Lenedo1|10359	3438722	3439386	---NA---
tco.1	chr2	80.5	85	3257937	3725608	467671	jgi.p|Lenedo1|1076118	3439066	3442118	alpha/beta-hydrolase
tco.1	chr2	80.5	85	3257937	3725608	467671	jgi.p|Lenedo1|1064778	3442178	3443921	mitochondrial processing peptidase
tco.1	chr2	80.5	85	3257937	3725608	467671	jgi.p|Lenedo1|1032221	3444315	3445844	udp-n-acetylglucosamine diphosphorylase
tco.1	chr2	80.5	85	3257937	3725608	467671	jgi.p|Lenedo1|10304	3445975	3448282	predicted protein
tco.1	chr2	80.5	85	3257937	3725608	467671	jgi.p|Lenedo1|1032258	3450644	3452484	rad51-associated protein brh2
tco.1	chr2	80.5	85	3257937	3725608	467671	jgi.p|Lenedo1|10644	3452925	3453748	Lanosterol synthase
tco.1	chr2	80.5	85	3257937	3725608	467671	jgi.p|Lenedo1|1076140	3456180	3458001	mitochondrial carrier
tco.1	chr2	80.5	85	3257937	3725608	467671	jgi.p|Lenedo1|1076144	3458002	3462492	PhoX domain-containing protein
tco.1	chr2	80.5	85	3257937	3725608	467671	jgi.p|Lenedo1|10651	3462133	3462569	Gcd10p-domain-containing protein
tco.1	chr2	80.5	85	3257937	3725608	467671	jgi.p|Lenedo1|1076147	3462493	3464056	Gcd10p-domain-containing protein
tco.1	chr2	80.5	85	3257937	3725608	467671	jgi.p|Lenedo1|1164437	3464112	3470968	microfilament motor
tco.1	chr2	80.5	85	3257937	3725608	467671	jgi.p|Lenedo1|1064786	3471900	3472901	aromatic compound dioxygenase
tco.1	chr2	80.5	85	3257937	3725608	467671	jgi.p|Lenedo1|1076166	3473160	3475090	predicted protein
tco.1	chr2	80.5	85	3257937	3725608	467671	jgi.p|Lenedo1|1076168	3475091	3476306	Lumazine-binding protein
tco.1	chr2	80.5	85	3257937	3725608	467671	jgi.p|Lenedo1|1076169	3476308	3478370	predicted protein
tco.1	chr2	80.5	85	3257937	3725608	467671	jgi.p|Lenedo1|1076172	3478378	3481680	bar domain-containing protein
tco.1	chr2	80.5	85	3257937	3725608	467671	jgi.p|Lenedo1|1164443	3481931	3485194	rho guanine nucleotide exchange factor 17
tco.1	chr2	80.5	85	3257937	3725608	467671	jgi.p|Lenedo1|1164445	3487285	3488088	aminodeoxychorismate lyase
tco.1	chr2	80.5	85	3257937	3725608	467671	jgi.p|Lenedo1|1031817	3488129	3491141	u3 small nucleolar rna-associated protein
tco.1	chr2	80.5	85	3257937	3725608	467671	jgi.p|Lenedo1|1157540	3491420	3492684	predicted protein
tco.1	chr2	80.5	85	3257937	3725608	467671	jgi.p|Lenedo1|1032587	3492994	3497136	predicted protein
tco.1	chr2	80.5	85	3257937	3725608	467671	jgi.p|Lenedo1|1242319	3497404	3498834	NIPSNAP-domain-containing protein
tco.1	chr2	80.5	85	3257937	3725608	467671	jgi.p|Lenedo1|1076224	3498835	3500666	predicted protein
tco.1	chr2	80.5	85	3257937	3725608	467671	jgi.p|Lenedo1|1157542	3500781	3503004	molybdenum cofactor biosynthesis prote
tco.1	chr2	80.5	85	3257937	3725608	467671	jgi.p|Lenedo1|1164451	3503113	3503627	duf953 domain protein
tco.1	chr2	80.5	85	3257937	3725608	467671	jgi.p|Lenedo1|1164452	3504398	3506635	predicted protein
tco.1	chr2	80.5	85	3257937	3725608	467671	jgi.p|Lenedo1|1031227	3507199	3510309	mitochondrial inner membrane protein
tco.1	chr2	80.5	85	3257937	3725608	467671	jgi.p|Lenedo1|1076244	3510421	3512486	trna methyltransferase trm5
tco.1	chr2	80.5	85	3257937	3725608	467671	jgi.p|Lenedo1|1031774	3512621	3513763	TatD DNase family Scn1
tco.1	chr2	80.5	85	3257937	3725608	467671	jgi.p|Lenedo1|1031548	3513823	3514749	V-snare-domain-containing protein
tco.1	chr2	80.5	85	3257937	3725608	467671	jgi.p|Lenedo1|1076251	3515380	3519729	wd40 containing snare-dependent exocytosis protein
tco.1	chr2	80.5	85	3257937	3725608	467671	jgi.p|Lenedo1|13411	3523831	3525099	---NA---
tco.1	chr2	80.5	85	3257937	3725608	467671	jgi.p|Lenedo1|13465	3524705	3525761	---NA---
tco.1	chr2	80.5	85	3257937	3725608	467671	jgi.p|Lenedo1|1157547	3525545	3527406	predicted protein
tco.1	chr2	80.5	85	3257937	3725608	467671	jgi.p|Lenedo1|1179547	3529703	3535574	P-loop containing nucleoside triphosphate hydrolase protein
tco.1	chr2	80.5	85	3257937	3725608	467671	jgi.p|Lenedo1|1076290	3535675	3536713	atp-binding cassette transporter
tco.1	chr2	80.5	85	3257937	3725608	467671	jgi.p|Lenedo1|1064802	3537407	3538124	pleiotropic drug resistance ABC transporter
tco.1	chr2	80.5	85	3257937	3725608	467671	jgi.p|Lenedo1|1032523	3538965	3544007	P-loop containing nucleoside triphosphate hydrolase protein
tco.1	chr2	80.5	85	3257937	3725608	467671	jgi.p|Lenedo1|1076303	3544079	3547872	ATP-dependent RNA helicase DHX8
tco.1	chr2	80.5	85	3257937	3725608	467671	jgi.p|Lenedo1|1076305	3547868	3548599	NTF2-like protein
tco.1	chr2	80.5	85	3257937	3725608	467671	jgi.p|Lenedo1|1138148	3548655	3550685	peptidase M24A, methionine aminopeptidase
tco.1	chr2	80.5	85	3257937	3725608	467671	jgi.p|Lenedo1|13855	3550486	3553281	predicted protein
tco.1	chr2	80.5	85	3257937	3725608	467671	jgi.p|Lenedo1|1032008	3553337	3554897	inositol phosphophingolipids phospholipase C
tco.1	chr2	80.5	85	3257937	3725608	467671	jgi.p|Lenedo1|13962	3554972	3557688	FAD/NAD-P-binding domain-containing protein
tco.1	chr2	80.5	85	3257937	3725608	467671	jgi.p|Lenedo1|1164470	3557573	3561818	predicted protein
tco.1	chr2	80.5	85	3257937	3725608	467671	jgi.p|Lenedo1|1269668	3561959	3564221	Exonuclease V
tco.1	chr2	80.5	85	3257937	3725608	467671	jgi.p|Lenedo1|1076327	3564223	3565360	copper transporter
tco.1	chr2	80.5	85	3257937	3725608	467671	jgi.p|Lenedo1|1164473	3565443	3569383	predicted protein
tco.1	chr2	80.5	85	3257937	3725608	467671	jgi.p|Lenedo1|1164474	3569571	3571457	NAD-P-binding protein
tco.1	chr2	80.5	85	3257937	3725608	467671	jgi.p|Lenedo1|1164475	3571594	3572172	Endoribonuclease L-PSP
tco.1	chr2	80.5	85	3257937	3725608	467671	jgi.p|Lenedo1|1076338	3573180	3576015	general substrate transporter
tco.1	chr2	80.5	85	3257937	3725608	467671	jgi.p|Lenedo1|1031864	3576752	3577073	hypothetical protein LENED_000162
tco.1	chr2	80.5	85	3257937	3725608	467671	jgi.p|Lenedo1|1157563	3577869	3580439	armadillo repeat protein
tco.1	chr2	80.5	85	3257937	3725608	467671	jgi.p|Lenedo1|14913	3581896	3583545	predicted protein
tco.1	chr2	80.5	85	3257937	3725608	467671	jgi.p|Lenedo1|1157564	3583809	3588226	histone deacetylase complex, SIN3 component
tco.1	chr2	80.5	85	3257937	3725608	467671	jgi.p|Lenedo1|1076373	3589331	3589912	---NA---
tco.1	chr2	80.5	85	3257937	3725608	467671	jgi.p|Lenedo1|1032492	3590269	3591946	pali-domain-containing protein
tco.1	chr2	80.5	85	3257937	3725608	467671	jgi.p|Lenedo1|1031915	3592140	3593958	Arginase/deacetylase
tco.1	chr2	80.5	85	3257937	3725608	467671	jgi.p|Lenedo1|1064820	3594457	3595153	---NA---
tco.1	chr2	80.5	85	3257937	3725608	467671	jgi.p|Lenedo1|15109	3595073	3596086	predicted protein
tco.1	chr2	80.5	85	3257937	3725608	467671	jgi.p|Lenedo1|1164484	3596616	3597301	f1f0 atp synthase assembly protein atp10
tco.1	chr2	80.5	85	3257937	3725608	467671	jgi.p|Lenedo1|1076381	3597477	3598804	WD40 repeat-like protein
tco.1	chr2	80.5	85	3257937	3725608	467671	jgi.p|Lenedo1|1076385	3598798	3602156	AAA-domain-containing protein
tco.1	chr2	80.5	85	3257937	3725608	467671	jgi.p|Lenedo1|15195	3603216	3604314	ribosomal protein l30
tco.1	chr2	80.5	85	3257937	3725608	467671	jgi.p|Lenedo1|1032044	3604308	3605480	bax inhibitor family protein
tco.1	chr2	80.5	85	3257937	3725608	467671	jgi.p|Lenedo1|1032201	3605898	3610068	Dna2-domain-containing protein
tco.1	chr2	80.5	85	3257937	3725608	467671	jgi.p|Lenedo1|1076406	3610197	3612580	WD40 repeat-like protein
tco.1	chr2	80.5	85	3257937	3725608	467671	jgi.p|Lenedo1|1269682	3612581	3615485	WD40 repeat-like protein
tco.1	chr2	80.5	85	3257937	3725608	467671	jgi.p|Lenedo1|1138194	3615487	3616370	ribosomal protein 60S
tco.1	chr2	80.5	85	3257937	3725608	467671	jgi.p|Lenedo1|1076411	3616381	3618357	predicted protein
tco.1	chr2	80.5	85	3257937	3725608	467671	jgi.p|Lenedo1|1076413	3618342	3619120	hypothetical protein LENED_000144
tco.1	chr2	80.5	85	3257937	3725608	467671	jgi.p|Lenedo1|1076415	3619870	3622717	Sec1-like protein
tco.1	chr2	80.5	85	3257937	3725608	467671	jgi.p|Lenedo1|1164495	3623260	3625037	predicted protein
tco.1	chr2	80.5	85	3257937	3725608	467671	jgi.p|Lenedo1|1076420	3625017	3625755	predicted protein
tco.1	chr2	80.5	85	3257937	3725608	467671	jgi.p|Lenedo1|1076427	3627015	3629570	predicted protein
tco.1	chr2	80.5	85	3257937	3725608	467671	jgi.p|Lenedo1|995172	3630954	3631301	transcription factor
tco.1	chr2	80.5	85	3257937	3725608	467671	jgi.p|Lenedo1|1242407	3631636	3636319	predicted protein
tco.1	chr2	80.5	85	3257937	3725608	467671	jgi.p|Lenedo1|1076430	3636543	3637371	hypothetical protein Moror_4778
tco.1	chr2	80.5	85	3257937	3725608	467671	jgi.p|Lenedo1|1164499	3638401	3641619	sphingomyelin phosphodiesterase
tco.1	chr2	80.5	85	3257937	3725608	467671	jgi.p|Lenedo1|16185	3641684	3642607	hypothetical protein GYMLUDRAFT_32614, partial
tco.1	chr2	80.5	85	3257937	3725608	467671	jgi.p|Lenedo1|16520	3644537	3646351	ribonuclease T2
tco.1	chr2	80.5	85	3257937	3725608	467671	jgi.p|Lenedo1|1032203	3646627	3647340	diadenosine 5',5'''-P1,P4-tetraphosphate asymmetrical hydrolase
tco.1	chr2	80.5	85	3257937	3725608	467671	jgi.p|Lenedo1|1032022	3647517	3649218	salicylate hydroxylase
tco.1	chr2	80.5	85	3257937	3725608	467671	jgi.p|Lenedo1|1032546	3649345	3650064	predicted protein
tco.1	chr2	80.5	85	3257937	3725608	467671	jgi.p|Lenedo1|1157583	3650546	3651513	Diaminopimelate epimerase-like protein
tco.1	chr2	80.5	85	3257937	3725608	467671	jgi.p|Lenedo1|1157584	3651708	3653092	predicted protein
tco.1	chr2	80.5	85	3257937	3725608	467671	jgi.p|Lenedo1|16143	3652965	3655158	proline-rich family protein
tco.1	chr2	80.5	85	3257937	3725608	467671	jgi.p|Lenedo1|1012340	3655298	3657352	ring finger domain protein
tco.1	chr2	80.5	85	3257937	3725608	467671	jgi.p|Lenedo1|16165	3657961	3659089	proteophosphoglycan 5
tco.1	chr2	80.5	85	3257937	3725608	467671	jgi.p|Lenedo1|1032466	3659573	3660801	osmosensor protein
tco.1	chr2	80.5	85	3257937	3725608	467671	jgi.p|Lenedo1|1064843	3662722	3663580	acyl-CoA N-acyltransferase
tco.1	chr2	80.5	85	3257937	3725608	467671	jgi.p|Lenedo1|1157588	3663859	3666915	predicted protein
tco.1	chr2	80.5	85	3257937	3725608	467671	jgi.p|Lenedo1|1242443	3667158	3672089	RNA polymerase II subunit A C-terminal domain phosphatase
tco.1	chr2	80.5	85	3257937	3725608	467671	jgi.p|Lenedo1|1164515	3672261	3675283	predicted protein
tco.1	chr2	80.5	85	3257937	3725608	467671	jgi.p|Lenedo1|1064847	3675557	3676611	plant basic secretory protein
tco.1	chr2	80.5	85	3257937	3725608	467671	jgi.p|Lenedo1|1164517	3677766	3678598	hypothetical protein LENED_000306
tco.1	chr2	80.5	85	3257937	3725608	467671	jgi.p|Lenedo1|1032081	3678865	3679701	predicted protein
tco.1	chr2	80.5	85	3257937	3725608	467671	jgi.p|Lenedo1|1031445	3680383	3682353	MFS general substrate transporter
tco.1	chr2	80.5	85	3257937	3725608	467671	jgi.p|Lenedo1|1076561	3682932	3684692	predicted protein
tco.1	chr2	80.5	85	3257937	3725608	467671	jgi.p|Lenedo1|1064852	3686332	3688550	---NA---
tco.1	chr2	80.5	85	3257937	3725608	467671	jgi.p|Lenedo1|1031234	3688872	3689456	hypothetical protein GYMLUDRAFT_165086, partial
tco.1	chr2	80.5	85	3257937	3725608	467671	jgi.p|Lenedo1|1164523	3692045	3693453	hypothetical protein GYMLUDRAFT_144429, partial
tco.1	chr2	80.5	85	3257937	3725608	467671	jgi.p|Lenedo1|1064855	3695234	3695860	---NA---
tco.1	chr2	80.5	85	3257937	3725608	467671	jgi.p|Lenedo1|1164524	3696443	3698792	hypothetical protein GYMLUDRAFT_247885
tco.1	chr2	80.5	85	3257937	3725608	467671	jgi.p|Lenedo1|1164525	3699108	3699840	---NA---
tco.1	chr2	80.5	85	3257937	3725608	467671	jgi.p|Lenedo1|1164526	3699874	3701295	hypothetical protein GYMLUDRAFT_56824
tco.1	chr2	80.5	85	3257937	3725608	467671	jgi.p|Lenedo1|1064858	3702911	3704209	predicted protein
tco.1	chr2	80.5	85	3257937	3725608	467671	jgi.p|Lenedo1|1138251	3706220	3707747	predicted protein
tco.1	chr2	80.5	85	3257937	3725608	467671	jgi.p|Lenedo1|1076565	3707918	3709118	hypothetical protein LENED_007801
tco.1	chr2	80.5	85	3257937	3725608	467671	jgi.p|Lenedo1|1076568	3709200	3713990	dna repair protein rad5
tco.1	chr2	80.5	85	3257937	3725608	467671	jgi.p|Lenedo1|1031564	3714074	3716012	t-complex protein eta subunit (tcp-1-eta)
tco.1	chr2	80.5	85	3257937	3725608	467671	jgi.p|Lenedo1|17498	3716150	3719031	MFS general substrate transporter
tco.1	chr2	80.5	85	3257937	3725608	467671	jgi.p|Lenedo1|1164533	3719061	3720570	mucin-like protein
tco.1	chr2	80.5	85	3257937	3725608	467671	jgi.p|Lenedo1|1164534	3720680	3722145	Protein FAM86B1
tco.1	chr2	80.5	85	3257937	3725608	467671	jgi.p|Lenedo1|1031780	3722209	3723520	WLM-domain-containing protein
tco.1	chr2	80.5	85	3257937	3725608	467671	jgi.p|Lenedo1|1164536	3724141	3727307	Demethylmenaquinone methyltransferase
